# Supplementary material for: A prognostic matrix gene expression signature defines functional glioblastoma phenotypes and niches
Source: Research Square preprint supplement (doi:10.21203/rs.3.rs-4541464/v1), 2024-06-21
Supplement: Supplementary file 1 [file Supplementary-Tables.docx]

**A prognostic matrix code defines functional glioblastoma phenotypes and niches**

**Supplementary Tables**

**Supplementary Table 1.** List of genes encoding core matrisome proteins

**Supplementary Table 2.** TCGA GBM cohort matrisome annotations and clinical features

**Supplementary Table 3**. Multivariate analysis to predict survival response based on clinical parameters

**Supplementary Table 4**. Clinical profiles of patients included in scRNAseq analysis

**Supplementary Table 5.** The proteogenomics based analysis of matrisome expression and patient survival (CPTAC cohort)

**Supplementary Table 6.** The analysis of anti-PD1 response and matrisome status
