# Supplementary material for: A prognostic matrix gene expression signature defines functional glioblastoma phenotypes and niches
Source: Research Square preprint supplement (doi:10.21203/rs.3.rs-4541464/v1), 2024-06-21
Supplement: Supplementary file 4 [file Table S1. List of genes encoding core matrisome genes.xlsx]

## Sheet: CMPs gene list
Table S1. List of genes encoding matrisome proteins (Filtered CMPs were shown in bold were used for further analysis)
Division	Category	Gene Symbol	Gene Name
Core matrisome	Collagens	COL10A1	collagen, type X, alpha 1
Core matrisome	Collagens	COL11A1	collagen, type XI, alpha 1	Citation:
Core matrisome	Collagens	COL11A2	collagen, type XI, alpha 2	Naba et al, The extracellular matrix: Tools and insights for the "omics" era. Matrix Biol. 2016 Jan;49:10-24. doi: 10.1016/j.matbio.2015.06.003. Epub 2015 Jul 8. PMID: 26163349; PMCID: PMC5013529.
Core matrisome	Collagens	COL12A1	collagen, type XII, alpha 1
Core matrisome	Collagens	COL13A1	collagen, type XIII, alpha 1
Core matrisome	Collagens	COL14A1	collagen, type XIV, alpha 1
Core matrisome	Collagens	COL15A1	collagen, type XV, alpha 1
Core matrisome	Collagens	COL16A1	collagen, type XVI, alpha 1
Core matrisome	Collagens	COL17A1	collagen, type XVII, alpha 1
Core matrisome	Collagens	COL18A1	collagen, type XVIII, alpha 1
Core matrisome	Collagens	COL19A1	collagen, type XIX, alpha 1
Core matrisome	Collagens	COL1A1	collagen, type I, alpha 1
Core matrisome	Collagens	COL1A2	collagen, type I, alpha 2
Core matrisome	Collagens	COL20A1	collagen, type XX, alpha 1
Core matrisome	Collagens	COL21A1	collagen, type XXI, alpha 1
Core matrisome	Collagens	COL22A1	collagen, type XXII, alpha 1
Core matrisome	Collagens	COL23A1	collagen, type XXIII, alpha 1
Core matrisome	Collagens	COL24A1	collagen, type XXIV, alpha 1
Core matrisome	Collagens	COL25A1	collagen, type XXV, alpha 1
Core matrisome	Collagens	COL26A1	EMI domain containing 2
Core matrisome	Collagens	COL27A1	collagen, type XXVII, alpha 1
Core matrisome	Collagens	COL28A1	collagen, type XXVIII, alpha 1
Core matrisome	Collagens	COL2A1	collagen, type II, alpha 1
Core matrisome	Collagens	COL3A1	collagen, type III, alpha 1
Core matrisome	Collagens	COL4A1	collagen, type IV, alpha 1
Core matrisome	Collagens	COL4A2	collagen, type IV, alpha 2
Core matrisome	Collagens	COL4A3	collagen, type IV, alpha 3 (Goodpasture antigen)
Core matrisome	Collagens	COL4A4	collagen, type IV, alpha 4
Core matrisome	Collagens	COL4A5	collagen, type IV, alpha 5
Core matrisome	Collagens	COL4A6	collagen, type IV, alpha 6
Core matrisome	Collagens	COL5A1	collagen, type V, alpha 1
Core matrisome	Collagens	COL5A2	collagen, type V, alpha 2
Core matrisome	Collagens	COL5A3	collagen, type V, alpha 3
Core matrisome	Collagens	COL6A1	collagen, type VI, alpha 1
Core matrisome	Collagens	COL6A2	collagen, type VI, alpha 2
Core matrisome	Collagens	COL6A3	collagen, type VI, alpha 3
Core matrisome	Collagens	COL6A5	collagen, type XXIX, alpha 1
Core matrisome	Collagens	COL6A6	collagen, type VI, alpha 6
Core matrisome	Collagens	COL7A1	collagen, type VII, alpha 1
Core matrisome	Collagens	COL8A1	collagen, type VIII, alpha 1
Core matrisome	Collagens	COL8A2	collagen, type VIII, alpha 2
Core matrisome	Collagens	COL9A1	collagen, type IX, alpha 1
Core matrisome	Collagens	COL9A2	collagen, type IX, alpha 2
Core matrisome	Collagens	COL9A3	collagen, type IX, alpha 3
Core matrisome	ECM Glycoproteins	ABI3BP	ABI family, member 3 (NESH) binding protein
Core matrisome	ECM Glycoproteins	ADIPOQ	adiponectin, C1Q and collagen domain containing
Core matrisome	ECM Glycoproteins	AEBP1	AE binding protein 1
Core matrisome	ECM Glycoproteins	AGRN	agrin
Core matrisome	ECM Glycoproteins	AMBN	ameloblastin (enamel matrix protein)
Core matrisome	ECM Glycoproteins	AMELX	amelogenin (amelogenesis imperfecta 1, X-linked)
Core matrisome	ECM Glycoproteins	AMELY	amelogenin, Y-linked
Core matrisome	ECM Glycoproteins	BGLAP	bone gamma-carboxyglutamate (gla) protein
Core matrisome	ECM Glycoproteins	BMPER	BMP binding endothelial regulator
Core matrisome	ECM Glycoproteins	BSPH1	binder of sperm protein homolog 1
Core matrisome	ECM Glycoproteins	CDCP2	CUB domain containing protein 2
Core matrisome	ECM Glycoproteins	CILP	cartilage intermediate layer protein, nucleotide pyrophosphohydrolase
Core matrisome	ECM Glycoproteins	CILP2	cartilage intermediate layer protein 2
Core matrisome	ECM Glycoproteins	COCH	coagulation factor C homolog, cochlin (Limulus polyphemus)
Core matrisome	ECM Glycoproteins	COLQ	collagen-like tail subunit (single strand of homotrimer) of asymmetric acetylcholinesterase
Core matrisome	ECM Glycoproteins	COMP	cartilage oligomeric matrix protein
Core matrisome	ECM Glycoproteins	CRELD1	cysteine-rich with EGF-like domains 1
Core matrisome	ECM Glycoproteins	CRELD2	cysteine-rich with EGF-like domains 2
Core matrisome	ECM Glycoproteins	CRIM1	cysteine rich transmembrane BMP regulator 1 (chordin-like)
Core matrisome	ECM Glycoproteins	CRISPLD1	cysteine-rich secretory protein LCCL domain containing 1
Core matrisome	ECM Glycoproteins	CRISPLD2	cysteine-rich secretory protein LCCL domain containing 2
Core matrisome	ECM Glycoproteins	CTGF	connective tissue growth factor
Core matrisome	ECM Glycoproteins	CTHRC1	collagen triple helix repeat containing 1
Core matrisome	ECM Glycoproteins	CYR61	cysteine-rich, angiogenic inducer, 61
Core matrisome	ECM Glycoproteins	DDX26B	DEAD/H (Asp-Glu-Ala-Asp/His) box polypeptide 26B
Core matrisome	ECM Glycoproteins	DMBT1	deleted in malignant brain tumors 1
Core matrisome	ECM Glycoproteins	DMP1	dentin matrix acidic phosphoprotein 1
Core matrisome	ECM Glycoproteins	DPT	dermatopontin
Core matrisome	ECM Glycoproteins	DSPP	dentin sialophosphoprotein
Core matrisome	ECM Glycoproteins	ECM1	extracellular matrix protein 1
Core matrisome	ECM Glycoproteins	ECM2	extracellular matrix protein 2, female organ and adipocyte specific
Core matrisome	ECM Glycoproteins	EDIL3	EGF-like repeats and discoidin I-like domains 3
Core matrisome	ECM Glycoproteins	EFEMP1	EGF-containing fibulin-like extracellular matrix protein 1
Core matrisome	ECM Glycoproteins	EFEMP2	EGF-containing fibulin-like extracellular matrix protein 2
Core matrisome	ECM Glycoproteins	EGFLAM	EGF-like, fibronectin type III and laminin G domains
Core matrisome	ECM Glycoproteins	ELN	elastin
Core matrisome	ECM Glycoproteins	ELSPBP1	epididymal sperm binding protein 1
Core matrisome	ECM Glycoproteins	EMID1	EMI domain containing 1
Core matrisome	ECM Glycoproteins	EMILIN1	elastin microfibril interfacer 1
Core matrisome	ECM Glycoproteins	EMILIN2	elastin microfibril interfacer 2
Core matrisome	ECM Glycoproteins	EMILIN3	elastin microfibril interfacer 3
Core matrisome	ECM Glycoproteins	EYS	eyes shut homolog (Drosophila)
Core matrisome	ECM Glycoproteins	FBLN1	fibulin 1
Core matrisome	ECM Glycoproteins	FBLN2	fibulin 2
Core matrisome	ECM Glycoproteins	FBLN5	fibulin 5
Core matrisome	ECM Glycoproteins	FBLN7	fibulin 7
Core matrisome	ECM Glycoproteins	FBN1	fibrillin 1
Core matrisome	ECM Glycoproteins	FBN2	fibrillin 2
Core matrisome	ECM Glycoproteins	FBN3	fibrillin 3
Core matrisome	ECM Glycoproteins	FGA	fibrinogen alpha chain
Core matrisome	ECM Glycoproteins	FGB	fibrinogen beta chain
Core matrisome	ECM Glycoproteins	FGG	fibrinogen gamma chain
Core matrisome	ECM Glycoproteins	FGL1	fibrinogen-like 1
Core matrisome	ECM Glycoproteins	FGL2	fibrinogen-like 2
Core matrisome	ECM Glycoproteins	FN1	fibronectin 1
Core matrisome	ECM Glycoproteins	FNDC1	fibronectin type III domain containing 1
Core matrisome	ECM Glycoproteins	FNDC7	fibronectin type III domain containing 7
Core matrisome	ECM Glycoproteins	FNDC8	fibronectin type III domain containing 8
Core matrisome	ECM Glycoproteins	FRAS1	Fraser syndrome 1
Core matrisome	ECM Glycoproteins	GAS6	growth arrest-specific 6
Core matrisome	ECM Glycoproteins	GLDN	gliomedin
Core matrisome	ECM Glycoproteins	HMCN1	hemicentin 1
Core matrisome	ECM Glycoproteins	HMCN2	hemicentin 2
Core matrisome	ECM Glycoproteins	IBSP	integrin-binding sialoprotein
Core matrisome	ECM Glycoproteins	IGFALS	insulin-like growth factor binding protein, acid labile subunit
Core matrisome	ECM Glycoproteins	IGFBP1	insulin-like growth factor binding protein 1
Core matrisome	ECM Glycoproteins	IGFBP2	insulin-like growth factor binding protein 2, 36kDa
Core matrisome	ECM Glycoproteins	IGFBP3	insulin-like growth factor binding protein 3
Core matrisome	ECM Glycoproteins	IGFBP4	insulin-like growth factor binding protein 4
Core matrisome	ECM Glycoproteins	IGFBP5	insulin-like growth factor binding protein 5
Core matrisome	ECM Glycoproteins	IGFBP6	insulin-like growth factor binding protein 6
Core matrisome	ECM Glycoproteins	IGFBP7	insulin-like growth factor binding protein 7
Core matrisome	ECM Glycoproteins	IGFBPL1	insulin-like growth factor binding protein-like 1
Core matrisome	ECM Glycoproteins	IGSF10	immunoglobulin superfamily, member 10
Core matrisome	ECM Glycoproteins	KAL1	Kallmann syndrome 1 sequence
Core matrisome	ECM Glycoproteins	KCP	kielin/chordin-like protein
Core matrisome	ECM Glycoproteins	LAMA1	laminin, alpha 1
Core matrisome	ECM Glycoproteins	LAMA2	laminin, alpha 2
Core matrisome	ECM Glycoproteins	LAMA3	laminin, alpha 3
Core matrisome	ECM Glycoproteins	LAMA4	laminin, alpha 4
Core matrisome	ECM Glycoproteins	LAMA5	laminin, alpha 5
Core matrisome	ECM Glycoproteins	LAMB1	laminin, beta 1
Core matrisome	ECM Glycoproteins	LAMB2	laminin, beta 2 (laminin S)
Core matrisome	ECM Glycoproteins	LAMB3	laminin, beta 3
Core matrisome	ECM Glycoproteins	LAMB4	laminin, beta 4
Core matrisome	ECM Glycoproteins	LAMC1	laminin, gamma 1 (formerly LAMB2)
Core matrisome	ECM Glycoproteins	LAMC2	laminin, gamma 2
Core matrisome	ECM Glycoproteins	LAMC3	laminin, gamma 3
Core matrisome	ECM Glycoproteins	LGI1	leucine-rich, glioma inactivated 1
Core matrisome	ECM Glycoproteins	LGI2	leucine-rich repeat LGI family, member 2
Core matrisome	ECM Glycoproteins	LGI3	leucine-rich repeat LGI family, member 3
Core matrisome	ECM Glycoproteins	LGI4	leucine-rich repeat LGI family, member 4
Core matrisome	ECM Glycoproteins	LRG1	leucine-rich alpha-2-glycoprotein 1
Core matrisome	ECM Glycoproteins	LTBP1	latent transforming growth factor beta binding protein 1
Core matrisome	ECM Glycoproteins	LTBP2	latent transforming growth factor beta binding protein 2
Core matrisome	ECM Glycoproteins	LTBP3	latent transforming growth factor beta binding protein 3
Core matrisome	ECM Glycoproteins	LTBP4	latent transforming growth factor beta binding protein 4
Core matrisome	ECM Glycoproteins	MATN1	matrilin 1, cartilage matrix protein
Core matrisome	ECM Glycoproteins	MATN2	matrilin 2
Core matrisome	ECM Glycoproteins	MATN3	matrilin 3
Core matrisome	ECM Glycoproteins	MATN4	matrilin 4
Core matrisome	ECM Glycoproteins	MEPE	matrix extracellular phosphoglycoprotein
Core matrisome	ECM Glycoproteins	MFAP1	microfibrillar-associated protein 1
Core matrisome	ECM Glycoproteins	MFAP2	microfibrillar-associated protein 2
Core matrisome	ECM Glycoproteins	MFAP3	microfibrillar-associated protein 3
Core matrisome	ECM Glycoproteins	MFAP4	microfibrillar-associated protein 4
Core matrisome	ECM Glycoproteins	MFAP5	microfibrillar associated protein 5
Core matrisome	ECM Glycoproteins	MFGE8	milk fat globule-EGF factor 8 protein
Core matrisome	ECM Glycoproteins	MGP	matrix Gla protein
Core matrisome	ECM Glycoproteins	MMRN1	multimerin 1
Core matrisome	ECM Glycoproteins	MMRN2	multimerin 2
Core matrisome	ECM Glycoproteins	MXRA5	matrix-remodelling associated 5
Core matrisome	ECM Glycoproteins	NDNF	chromosome 4 open reading frame 31
Core matrisome	ECM Glycoproteins	NELL1	NEL-like 1 (chicken)
Core matrisome	ECM Glycoproteins	NELL2	NEL-like 2 (chicken)
Core matrisome	ECM Glycoproteins	NID1	nidogen 1
Core matrisome	ECM Glycoproteins	NID2	nidogen 2 (osteonidogen)
Core matrisome	ECM Glycoproteins	NOV	nephroblastoma overexpressed gene
Core matrisome	ECM Glycoproteins	NPNT	nephronectin
Core matrisome	ECM Glycoproteins	NTN1	netrin 1
Core matrisome	ECM Glycoproteins	NTN3	netrin 3
Core matrisome	ECM Glycoproteins	NTN4	netrin 4
Core matrisome	ECM Glycoproteins	NTN5	netrin 5
Core matrisome	ECM Glycoproteins	NTNG1	netrin G1
Core matrisome	ECM Glycoproteins	NTNG2	netrin G2
Core matrisome	ECM Glycoproteins	OIT3	oncoprotein induced transcript 3
Core matrisome	ECM Glycoproteins	OTOG	otogelin
Core matrisome	ECM Glycoproteins	OTOL1	otolin-1
Core matrisome	ECM Glycoproteins	PAPLN	papilin, proteoglycan-like sulfated glycoprotein
Core matrisome	ECM Glycoproteins	PCOLCE	procollagen C-endopeptidase enhancer
Core matrisome	ECM Glycoproteins	PCOLCE2	procollagen C-endopeptidase enhancer 2
Core matrisome	ECM Glycoproteins	POMZP3	POM (POM121 homolog, rat) and ZP3 fusion
Core matrisome	ECM Glycoproteins	POSTN	periostin, osteoblast specific factor
Core matrisome	ECM Glycoproteins	PXDN	peroxidasin homolog (Drosophila)
Core matrisome	ECM Glycoproteins	PXDNL	peroxidasin homolog (Drosophila)-like
Core matrisome	ECM Glycoproteins	RELN	reelin
Core matrisome	ECM Glycoproteins	RSPO1	R-spondin homolog (Xenopus laevis)
Core matrisome	ECM Glycoproteins	RSPO2	R-spondin 2 homolog (Xenopus laevis)
Core matrisome	ECM Glycoproteins	RSPO3	R-spondin 3 homolog (Xenopus laevis)
Core matrisome	ECM Glycoproteins	RSPO4	R-spondin family, member 4
Core matrisome	ECM Glycoproteins	SBSPON	chromosome 8 open reading frame 84
Core matrisome	ECM Glycoproteins	SLIT1	slit homolog 1 (Drosophila)
Core matrisome	ECM Glycoproteins	SLIT2	slit homolog 2 (Drosophila)
Core matrisome	ECM Glycoproteins	SLIT3	slit homolog 3 (Drosophila)
Core matrisome	ECM Glycoproteins	SMOC1	SPARC related modular calcium binding 1
Core matrisome	ECM Glycoproteins	SMOC2	SPARC related modular calcium binding 2
Core matrisome	ECM Glycoproteins	SNED1	sushi, nidogen and EGF-like domains 1
Core matrisome	ECM Glycoproteins	SPARC	secreted protein, acidic, cysteine-rich (osteonectin)
Core matrisome	ECM Glycoproteins	SPARCL1	SPARC-like 1 (hevin)
Core matrisome	ECM Glycoproteins	SPON1	spondin 1, extracellular matrix protein
Core matrisome	ECM Glycoproteins	SPON2	spondin 2, extracellular matrix protein
Core matrisome	ECM Glycoproteins	SPP1	secreted phosphoprotein 1
Core matrisome	ECM Glycoproteins	SRPX	sushi-repeat-containing protein, X-linked
Core matrisome	ECM Glycoproteins	SRPX2	sushi-repeat-containing protein, X-linked 2
Core matrisome	ECM Glycoproteins	SSPO	SCO-spondin homolog (Bos taurus)
Core matrisome	ECM Glycoproteins	SVEP1	sushi, von Willebrand factor type A, EGF and pentraxin domain containing 1
Core matrisome	ECM Glycoproteins	TECTA	tectorin alpha
Core matrisome	ECM Glycoproteins	TECTB	tectorin beta
Core matrisome	ECM Glycoproteins	TGFBI	transforming growth factor, beta-induced, 68kDa
Core matrisome	ECM Glycoproteins	THBS1	thrombospondin 1
Core matrisome	ECM Glycoproteins	THBS2	thrombospondin 2
Core matrisome	ECM Glycoproteins	THBS3	thrombospondin 3
Core matrisome	ECM Glycoproteins	THBS4	thrombospondin 4
Core matrisome	ECM Glycoproteins	THSD4	thrombospondin, type I, domain containing 4
Core matrisome	ECM Glycoproteins	TINAG	tubulointerstitial nephritis antigen
Core matrisome	ECM Glycoproteins	TINAGL1	tubulointerstitial nephritis antigen-like 1
Core matrisome	ECM Glycoproteins	TNC	tenascin C
Core matrisome	ECM Glycoproteins	TNFAIP6	tumor necrosis factor, alpha-induced protein 6
Core matrisome	ECM Glycoproteins	TNN	tenascin N
Core matrisome	ECM Glycoproteins	TNR	tenascin R (restrictin, janusin)
Core matrisome	ECM Glycoproteins	TNXB	tenascin XB
Core matrisome	ECM Glycoproteins	TSKU	tsukushi small leucine rich proteoglycan homolog (Xenopus laevis)
Core matrisome	ECM Glycoproteins	TSPEAR	chromosome 21 open reading frame 29
Core matrisome	ECM Glycoproteins	VIT	vitrin
Core matrisome	ECM Glycoproteins	VTN	vitronectin
Core matrisome	ECM Glycoproteins	VWA1	von Willebrand factor A domain containing 1
Core matrisome	ECM Glycoproteins	VWA2	von Willebrand factor A domain containing 2
Core matrisome	ECM Glycoproteins	VWA3A	von Willebrand factor A domain containing 3A
Core matrisome	ECM Glycoproteins	VWA3B	von Willebrand factor A domain containing 3B
Core matrisome	ECM Glycoproteins	VWA5A	von Willebrand factor A domain containing 5A
Core matrisome	ECM Glycoproteins	VWA5B1	von Willebrand factor A domain containing 5B1
Core matrisome	ECM Glycoproteins	VWA5B2	von Willebrand factor A domain containing 5B2
Core matrisome	ECM Glycoproteins	VWA7	chromosome 6 open reading frame 27
Core matrisome	ECM Glycoproteins	VWA9	chromosome 15 open reading frame 44
Core matrisome	ECM Glycoproteins	VWCE	von Willebrand factor C and EGF domains
Core matrisome	ECM Glycoproteins	VWDE	von Willebrand factor D and EGF domains
Core matrisome	ECM Glycoproteins	VWF	von Willebrand factor
Core matrisome	ECM Glycoproteins	WISP1	WNT1 inducible signaling pathway protein 1
Core matrisome	ECM Glycoproteins	WISP2	WNT1 inducible signaling pathway protein 2
Core matrisome	ECM Glycoproteins	WISP3	WNT1 inducible signaling pathway protein 3
Core matrisome	ECM Glycoproteins	ZP1	zona pellucida glycoprotein 1 (sperm receptor)
Core matrisome	ECM Glycoproteins	ZP2	zona pellucida glycoprotein 2 (sperm receptor)
Core matrisome	ECM Glycoproteins	ZP3	zona pellucida glycoprotein 3 (sperm receptor)
Core matrisome	ECM Glycoproteins	ZP4	zona pellucida glycoprotein 4
Core matrisome	ECM Glycoproteins	ZPLD1	zona pellucida-like domain containing 1
Core matrisome	Proteoglycans	ACAN	aggrecan
Core matrisome	Proteoglycans	ASPN	asporin
Core matrisome	Proteoglycans	BCAN	brevican
Core matrisome	Proteoglycans	BGN	biglycan
Core matrisome	Proteoglycans	CHAD	chondroadherin
Core matrisome	Proteoglycans	CHADL	chondroadherin-like
Core matrisome	Proteoglycans	DCN	decorin
Core matrisome	Proteoglycans	EPYC	epiphycan
Core matrisome	Proteoglycans	ESM1	endothelial cell-specific molecule 1
Core matrisome	Proteoglycans	FMOD	fibromodulin
Core matrisome	Proteoglycans	HAPLN1	hyaluronan and proteoglycan link protein 1
Core matrisome	Proteoglycans	HAPLN2	hyaluronan and proteoglycan link protein 2
Core matrisome	Proteoglycans	HAPLN3	hyaluronan and proteoglycan link protein 3
Core matrisome	Proteoglycans	HAPLN4	hyaluronan and proteoglycan link protein 4
Core matrisome	Proteoglycans	HSPG2	heparan sulfate proteoglycan 2
Core matrisome	Proteoglycans	IMPG1	interphotoreceptor matrix proteoglycan 1
Core matrisome	Proteoglycans	IMPG2	interphotoreceptor matrix proteoglycan 2
Core matrisome	Proteoglycans	KERA	keratocan
Core matrisome	Proteoglycans	LUM	lumican
Core matrisome	Proteoglycans	NCAN	neurocan
Core matrisome	Proteoglycans	NYX	nyctalopin
Core matrisome	Proteoglycans	OGN	osteoglycin
Core matrisome	Proteoglycans	OMD	osteomodulin
Core matrisome	Proteoglycans	OPTC	opticin
Core matrisome	Proteoglycans	PODN	podocan
Core matrisome	Proteoglycans	PODNL1	podocan-like 1
Core matrisome	Proteoglycans	PRELP	proline/arginine-rich end leucine-rich repeat protein
Core matrisome	Proteoglycans	PRG2	proteoglycan 2, bone marrow (natural killer cell activator, eosinophil granule major basic protein)
Core matrisome	Proteoglycans	PRG3	proteoglycan 3
Core matrisome	Proteoglycans	PRG4	p53-responsive gene 4
Core matrisome	Proteoglycans	SPOCK1	sparc/osteonectin, cwcv and kazal-like domains proteoglycan (testican) 1
Core matrisome	Proteoglycans	SPOCK2	sparc/osteonectin, cwcv and kazal-like domains proteoglycan (testican) 2
Core matrisome	Proteoglycans	SPOCK3	sparc/osteonectin, cwcv and kazal-like domains proteoglycan (testican) 3
Core matrisome	Proteoglycans	SRGN	serglycin
Core matrisome	Proteoglycans	VCAN	versican
