# Supplementary material for: A prognostic matrix gene expression signature defines functional glioblastoma phenotypes and niches
Source: Research Square preprint supplement (doi:10.21203/rs.3.rs-4541464/v1), 2024-06-21
Supplement: Supplementary file 7 [file Table S2. Matrix annotations and demographics.xlsx]

## Sheet: TCGA Patients Demographics
Table S2. Matrix annotations and demographics of TCGA patients
Case	Matrisome groups	Gene expression Subtype	Histology	Grade	Age (years at diagnosis)	Gender	Karnofsky Performance Score	IDH status	MGMT promoter status	Gene expression Subtype	Treatment
TCGA-06-2569	M-H	Mesenchymal	Glioblastoma	G4	24	female	80	WT	Unmethylated	Mesenchymal	Radiation
TCGA-06-0190	M-H	Mesenchymal	Glioblastoma	G4	62	male	80	WT	NA	Mesenchymal	Chemoradiation
TCGA-06-0190	M-H	Mesenchymal	Glioblastoma	G4	62	male	80	WT	NA	Mesenchymal	Chemoradiation
TCGA-28-5218	M-H	Mesenchymal	Glioblastoma	G4	63	male	NA	WT	Unmethylated	Mesenchymal	Chemoradiation
TCGA-02-0055	M-H	Mesenchymal	Glioblastoma	G4	62	female	80	WT	Unmethylated	Mesenchymal	Chemoradiation
TCGA-06-0130	M-H	Mesenchymal	Glioblastoma	G4	54	male	80	WT	Unmethylated	Mesenchymal	Chemoradiation
TCGA-19-4065	M-H	NA	Glioblastoma	G4	36	male	NA	NA	Unmethylated	NA	N/A
TCGA-19-1389	M-H	Mesenchymal	Glioblastoma	G4	51	male	80	WT	Unmethylated	Mesenchymal	Chemoradiation
TCGA-06-0644	M-H	Mesenchymal	Glioblastoma	G4	71	male	80	WT	NA	Mesenchymal	Chemoradiation
TCGA-06-0750	M-H	Mesenchymal	Glioblastoma	G4	43	male	80	WT	NA	Mesenchymal	Radiation
TCGA-26-5135	M-H	Proneural	Glioblastoma	G4	72	female	NA	WT	Methylated	Proneural	Radiation
TCGA-76-4927	M-H	Neural	Glioblastoma	G4	58	male	80	WT	Unmethylated	Neural	Others
TCGA-27-2528	M-H	Classical	Glioblastoma	G4	62	male	80	WT	Methylated	Classical	Chemoradiation
TCGA-28-1753	M-H	Mesenchymal	Glioblastoma	G4	53	male	NA	WT	Unmethylated	Mesenchymal	Chemoradiation
TCGA-06-5413	M-H	Neural	Glioblastoma	G4	67	male	60	WT	Unmethylated	Neural	Chemoradiation
TCGA-06-0211	M-H	Classical	Glioblastoma	G4	47	male	100	WT	NA	Classical	Radiation
TCGA-32-4213	M-H	Mesenchymal	Glioblastoma	G4	47	female	NA	WT	Methylated	Mesenchymal	Chemoradiation
TCGA-06-0645	M-H	Mesenchymal	Glioblastoma	G4	55	female	NA	WT	NA	Mesenchymal	Radiation
TCGA-41-3915	M-H	Mesenchymal	Glioblastoma	G4	48	male	NA	WT	Methylated	Mesenchymal	Chemoradiation
TCGA-28-5215	M-H	Mesenchymal	Glioblastoma	G4	62	female	90	WT	Methylated	Mesenchymal	Chemoradiation
TCGA-28-5216	M-H	Mesenchymal	Glioblastoma	G4	52	male	80	WT	Unmethylated	Mesenchymal	Chemoradiation
TCGA-06-0210	M-H	Mesenchymal	Glioblastoma	G4	72	female	NA	WT	NA	Mesenchymal	Radiation
TCGA-27-1830	M-H	Proneural	Glioblastoma	G4	57	male	80	WT	Unmethylated	Proneural	Radiation
TCGA-06-0152	M-H	Mesenchymal	Glioblastoma	G4	68	male	NA	WT	NA	Mesenchymal	Radiation
TCGA-32-2638	M-H	Classical	Glioblastoma	G4	67	male	NA	WT	Methylated	Classical	Chemoradiation
TCGA-06-0125	M-H	Classical	Glioblastoma	G4	63	female	60	WT	Methylated	Classical	Chemoradiation
TCGA-02-0047	M-H	Proneural	Glioblastoma	G4	78	male	80	WT	Unmethylated	Proneural	Radiation
TCGA-06-0168	M-H	Mesenchymal	Glioblastoma	G4	59	female	100	WT	NA	Mesenchymal	Chemoradiation
TCGA-06-2562	M-H	Mesenchymal	Glioblastoma	G4	81	male	80	WT	Unmethylated	Mesenchymal	Chemoradiation
TCGA-27-2524	M-H	Mesenchymal	Glioblastoma	G4	56	male	80	WT	Unmethylated	Mesenchymal	Chemoradiation
TCGA-14-0781	M-H	Mesenchymal	Glioblastoma	G4	49	male	NA	WT	Unmethylated	Mesenchymal	Radiation
TCGA-76-4928	M-H	Classical	Glioblastoma	G4	85	female	80	WT	Methylated	Classical	Chemoradiation
TCGA-06-5412	M-H	Mesenchymal	Glioblastoma	G4	78	female	80	WT	Methylated	Mesenchymal	Chemoradiation
TCGA-19-4065	M-H	NA	Glioblastoma	G4	36	male	NA	NA	Unmethylated	NA	N/A
TCGA-06-0210	M-H	Mesenchymal	Glioblastoma	G4	72	female	NA	WT	NA	Mesenchymal	Radiation
TCGA-14-0789	M-H	Mesenchymal	Glioblastoma	G4	54	male	40	WT	Methylated	Mesenchymal	Chemoradiation
TCGA-12-0619	M-H	Mesenchymal	Glioblastoma	G4	60	male	80	WT	NA	Mesenchymal	Chemoradiation
TCGA-06-0649	M-H	Neural	Glioblastoma	G4	73	female	NA	WT	NA	Neural	Radiation
TCGA-27-1832	M-H	Mesenchymal	Glioblastoma	G4	59	female	100	WT	Unmethylated	Mesenchymal	Radiation
TCGA-06-0171	M-H	Neural	Glioblastoma	G4	65	male	100	WT	NA	Neural	Chemoradiation
TCGA-06-5410	M-H	Mesenchymal	Glioblastoma	G4	72	female	60	WT	Methylated	Mesenchymal	Radiation
TCGA-32-2615	M-H	Mesenchymal	Glioblastoma	G4	62	male	80	WT	Unmethylated	Mesenchymal	Chemoradiation
TCGA-06-0141	M-H	Mesenchymal	Glioblastoma	G4	62	male	80	WT	Unmethylated	Mesenchymal	Chemoradiation
TCGA-41-4097	M-H	Mesenchymal	Glioblastoma	G4	63	female	NA	WT	Unmethylated	Mesenchymal	Radiation
TCGA-06-0132	M-La	Neural	Glioblastoma	G4	49	male	NA	WT	NA	Neural	Chemoradiation
TCGA-06-0138	M-La	Neural	Glioblastoma	G4	43	male	80	WT	NA	Neural	Chemoradiation
TCGA-06-0156	M-La	Proneural	Glioblastoma	G4	57	male	NA	WT	NA	Proneural	Radiation
TCGA-06-0158	M-La	Classical	Glioblastoma	G4	73	male	80	WT	NA	Classical	Radiation
TCGA-06-0174	M-La	Proneural	Glioblastoma	G4	54	male	80	WT	NA	Proneural	Radiation
TCGA-06-0178	M-La	Neural	Glioblastoma	G4	38	male	NA	WT	NA	Neural	Chemoradiation
TCGA-06-0238	M-La	Proneural	Glioblastoma	G4	46	male	80	WT	NA	Proneural	Chemoradiation
TCGA-06-0646	M-La	Proneural	Glioblastoma	G4	60	male	80	WT	NA	Proneural	Chemoradiation
TCGA-06-0686	M-La	Proneural	Glioblastoma	G4	53	male	NA	WT	NA	Proneural	Chemoradiation
TCGA-06-0743	M-La	Classical	Glioblastoma	G4	69	male	100	WT	NA	Classical	Radiation
TCGA-06-0745	M-La	Proneural	Glioblastoma	G4	59	male	80	WT	NA	Proneural	Chemoradiation
TCGA-06-0747	M-La	Classical	Glioblastoma	G4	53	male	80	WT	NA	Classical	Radiation
TCGA-06-0749	M-La	Neural	Glioblastoma	G4	50	male	NA	WT	NA	Neural	Radiation
TCGA-06-0882	M-La	Neural	Glioblastoma	G4	30	male	60	WT	Unmethylated	Neural	Chemoradiation
TCGA-06-1084	M-La	Mesenchymal	Glioblastoma	G4	54	male	80	WT	Methylated	Mesenchymal	Radiation
TCGA-06-2558	M-La	Proneural	Glioblastoma	G4	75	female	60	WT	Unmethylated	Proneural	Radiation
TCGA-06-2561	M-La	Mesenchymal	Glioblastoma	G4	53	female	80	WT	Unmethylated	Mesenchymal	Chemoradiation
TCGA-06-2567	M-La	Neural	Glioblastoma	G4	65	male	80	WT	Methylated	Neural	Chemoradiation
TCGA-06-5411	M-La	Neural	Glioblastoma	G4	51	male	80	WT	Unmethylated	Neural	Radiation
TCGA-06-5415	M-La	Classical	Glioblastoma	G4	60	male	100	WT	Unmethylated	Classical	Chemoradiation
TCGA-06-5416	M-La	Proneural	Glioblastoma	G4	23	female	80	NA	Unmethylated	Proneural	Chemoradiation
TCGA-06-5858	M-La	Mesenchymal	Glioblastoma	G4	45	female	100	WT	Unmethylated	Mesenchymal	Chemoradiation
TCGA-06-5859	M-La	Neural	Glioblastoma	G4	63	male	40	WT	Unmethylated	Neural	Chemoradiation
TCGA-08-0386	M-La	Neural	Glioblastoma	G4	74	male	80	WT	NA	Neural	Chemoradiation
TCGA-12-0616	M-La	Proneural	Glioblastoma	G4	36	female	100	WT	NA	Proneural	Chemoradiation
TCGA-12-0618	M-La	Proneural	Glioblastoma	G4	49	male	60	WT	NA	Proneural	Chemoradiation
TCGA-12-0821	M-La	Neural	Glioblastoma	G4	62	male	60	WT	Unmethylated	Neural	Chemoradiation
TCGA-12-1597	M-La	Proneural	Glioblastoma	G4	62	female	80	WT	Unmethylated	Proneural	Chemoradiation
TCGA-14-0790	M-La	Classical	Glioblastoma	G4	64	female	60	WT	Methylated	Classical	Chemoradiation
TCGA-14-1825	M-La	Proneural	Glioblastoma	G4	70	male	80	WT	Unmethylated	Proneural	Radiation
TCGA-16-0846	M-La	Proneural	Glioblastoma	G4	85	male	NA	WT	Methylated	Proneural	Radiation
TCGA-19-0957	M-La	Proneural	Glioblastoma	G4	48	female	NA	WT	Unmethylated	Proneural	Chemoradiation
TCGA-19-1390	M-La	Proneural	Glioblastoma	G4	63	female	60	WT	Methylated	Proneural	Radiation
TCGA-19-1787	M-La	Mesenchymal	Glioblastoma	G4	48	male	80	NA	Methylated	Mesenchymal	Chemoradiation
TCGA-19-2620	M-La	Neural	Glioblastoma	G4	70	male	40	WT	Methylated	Neural	Chemoradiation
TCGA-19-2625	M-La	Classical	Glioblastoma	G4	76	female	NA	WT	Unmethylated	Classical	Radiation
TCGA-19-5960	M-La	Proneural	Glioblastoma	G4	56	male	80	WT	Unmethylated	Proneural	Chemoradiation
TCGA-26-5132	M-La	Classical	Glioblastoma	G4	74	male	60	WT	Methylated	Classical	Chemoradiation
TCGA-26-5133	M-La	G-CIMP	Glioblastoma	G4	59	male	80	WT	Unmethylated	G-CIMP	Chemoradiation
TCGA-26-5134	M-La	Proneural	Glioblastoma	G4	74	male	60	WT	Unmethylated	Proneural	Radiation
TCGA-26-5136	M-La	Mesenchymal	Glioblastoma	G4	78	female	NA	WT	Methylated	Mesenchymal	Radiation
TCGA-27-1834	M-La	Neural	Glioblastoma	G4	56	male	80	WT	Methylated	Neural	Chemoradiation
TCGA-27-1837	M-La	Classical	Glioblastoma	G4	36	male	80	WT	Methylated	Classical	Chemoradiation
TCGA-27-2519	M-La	Mesenchymal	Glioblastoma	G4	48	male	80	WT	Unmethylated	Mesenchymal	Chemoradiation
TCGA-28-1747	M-La	Classical	Glioblastoma	G4	44	male	NA	WT	Methylated	Classical	Radiation
TCGA-28-2510	M-La	NA	NA	NA	NA	NA	NA	WT	Unmethylated	NA	Chemoradiation
TCGA-28-5207	M-La	Mesenchymal	Glioblastoma	G4	71	male	70	WT	Unmethylated	Mesenchymal	Chemoradiation
TCGA-28-5220	M-La	Classical	Glioblastoma	G4	67	male	90	WT	Unmethylated	Classical	Chemoradiation
TCGA-32-1970	M-La	Classical	Glioblastoma	G4	59	male	NA	WT	Unmethylated	Classical	Chemoradiation
TCGA-32-1980	M-La	Neural	Glioblastoma	G4	72	male	NA	WT	Unmethylated	Neural	Radiation
TCGA-32-2616	M-La	Mesenchymal	Glioblastoma	G4	48	female	NA	NA	Methylated	Mesenchymal	Chemoradiation
TCGA-32-2634	M-La	Proneural	Glioblastoma	G4	82	male	NA	WT	Methylated	Proneural	Chemoradiation
TCGA-41-2571	M-La	Proneural	Glioblastoma	G4	89	male	60	WT	Unmethylated	Proneural	Chemoradiation
TCGA-41-5651	M-La	Proneural	Glioblastoma	G4	59	female	NA	WT	Methylated	Proneural	Chemoradiation
TCGA-76-4925	M-La	Proneural	Glioblastoma	G4	76	male	100	WT	Methylated	Proneural	Chemoradiation
TCGA-76-4926	M-La	Classical	Glioblastoma	G4	68	male	80	WT	Unmethylated	Classical	Radiation
TCGA-76-4929	M-La	Neural	Glioblastoma	G4	76	female	80	WT	Methylated	Neural	Others
TCGA-76-4931	M-La	Classical	Glioblastoma	G4	70	female	80	WT	Unmethylated	Classical	Chemoradiation
TCGA-02-2485	M-Lb	Classical	Glioblastoma	G4	53	male	80	WT	Unmethylated	Classical	Chemoradiation
TCGA-02-2486	M-Lb	Mesenchymal	Glioblastoma	G4	64	male	80	WT	Unmethylated	Mesenchymal	Chemoradiation
TCGA-06-0125	M-Lb	Classical	Glioblastoma	G4	63	female	60	WT	Methylated	Classical	Chemoradiation
TCGA-06-0157	M-Lb	Classical	Glioblastoma	G4	63	female	40	WT	NA	Classical	Radiation
TCGA-06-0184	M-Lb	Mesenchymal	Glioblastoma	G4	63	male	80	WT	NA	Mesenchymal	Radiation
TCGA-06-0187	M-Lb	Classical	Glioblastoma	G4	69	male	60	WT	NA	Classical	Radiation
TCGA-06-0211	M-Lb	Classical	Glioblastoma	G4	47	male	100	WT	NA	Classical	Radiation
TCGA-06-0219	M-Lb	Neural	Glioblastoma	G4	67	male	NA	WT	NA	Neural	Radiation
TCGA-06-0744	M-Lb	Classical	Glioblastoma	G4	66	male	80	WT	NA	Classical	Radiation
TCGA-06-0878	M-Lb	Mesenchymal	Glioblastoma	G4	74	male	80	WT	Unmethylated	Mesenchymal	Chemoradiation
TCGA-06-2557	M-Lb	Mesenchymal	Glioblastoma	G4	76	male	40	WT	Unmethylated	Mesenchymal	Radiation
TCGA-06-2559	M-Lb	Proneural	Glioblastoma	G4	83	male	60	WT	Methylated	Proneural	Chemoradiation
TCGA-06-2563	M-Lb	Classical	Glioblastoma	G4	72	female	80	WT	Methylated	Classical	Chemoradiation
TCGA-06-2564	M-Lb	Classical	Glioblastoma	G4	50	male	100	WT	Unmethylated	Classical	Chemoradiation
TCGA-06-2565	M-Lb	Classical	Glioblastoma	G4	59	male	100	WT	Methylated	Classical	Chemoradiation
TCGA-06-5408	M-Lb	Classical	Glioblastoma	G4	54	female	80	WT	Unmethylated	Classical	Chemoradiation
TCGA-06-5414	M-Lb	Classical	Glioblastoma	G4	61	male	80	WT	Unmethylated	Classical	Chemoradiation
TCGA-06-5418	M-Lb	Mesenchymal	Glioblastoma	G4	75	female	60	WT	Unmethylated	Mesenchymal	Radiation
TCGA-06-5856	M-Lb	Classical	Glioblastoma	G4	58	male	NA	WT	Unmethylated	Classical	Radiation
TCGA-12-3650	M-Lb	Proneural	Glioblastoma	G4	46	male	80	WT	Unmethylated	Proneural	Chemoradiation
TCGA-12-3652	M-Lb	Classical	Glioblastoma	G4	60	male	80	WT	Unmethylated	Classical	Chemoradiation
TCGA-12-3653	M-Lb	Classical	Glioblastoma	G4	34	female	80	WT	Unmethylated	Classical	Chemoradiation
TCGA-12-5295	M-Lb	Neural	Glioblastoma	G4	60	female	NA	WT	Methylated	Neural	Chemoradiation
TCGA-12-5299	M-Lb	Classical	Glioblastoma	G4	56	female	80	WT	Unmethylated	Classical	Chemoradiation
TCGA-14-0736	M-Lb	Mesenchymal	Glioblastoma	G4	49	male	100	NA	Unmethylated	Mesenchymal	Chemoradiation
TCGA-14-0787	M-Lb	Classical	Glioblastoma	G4	69	male	60	WT	Methylated	Classical	Radiation
TCGA-14-0817	M-Lb	Neural	Glioblastoma	G4	69	female	60	WT	Unmethylated	Neural	Radiation
TCGA-14-1034	M-Lb	Mesenchymal	Glioblastoma	G4	60	female	60	WT	Methylated	Mesenchymal	Chemoradiation
TCGA-14-1034	M-Lb	Mesenchymal	Glioblastoma	G4	60	female	60	WT	Methylated	Mesenchymal	Chemoradiation
TCGA-14-1402	M-Lb	Classical	Glioblastoma	G4	58	female	80	NA	Methylated	Classical	Chemoradiation
TCGA-14-1823	M-Lb	Mesenchymal	Glioblastoma	G4	58	female	80	WT	Methylated	Mesenchymal	Chemoradiation
TCGA-14-1829	M-Lb	Neural	Glioblastoma	G4	57	male	60	WT	Unmethylated	Neural	Chemoradiation
TCGA-14-2554	M-Lb	Neural	Glioblastoma	G4	52	female	60	WT	Unmethylated	Neural	Radiation
TCGA-15-0742	M-Lb	Classical	Glioblastoma	G4	65	male	80	WT	NA	Classical	Chemoradiation
TCGA-16-1045	M-Lb	Mesenchymal	Glioblastoma	G4	49	female	NA	WT	Methylated	Mesenchymal	Radiation
TCGA-19-2619	M-Lb	Classical	Glioblastoma	G4	55	female	40	WT	Methylated	Classical	Chemoradiation
TCGA-19-2624	M-Lb	Proneural	Glioblastoma	G4	51	male	NA	WT	Unmethylated	Proneural	Radiation
TCGA-26-5139	M-Lb	Mesenchymal	Glioblastoma	G4	65	female	60	WT	Unmethylated	Mesenchymal	Radiation
TCGA-27-1831	M-Lb	Neural	Glioblastoma	G4	66	male	80	WT	Unmethylated	Neural	Chemoradiation
TCGA-27-1835	M-Lb	Classical	Glioblastoma	G4	53	female	80	WT	Methylated	Classical	Chemoradiation
TCGA-27-2523	M-Lb	Classical	Glioblastoma	G4	63	male	80	WT	Methylated	Classical	Chemoradiation
TCGA-27-2526	M-Lb	Neural	Glioblastoma	G4	79	female	40	WT	Unmethylated	Neural	Radiation
TCGA-28-2499	M-Lb	NA	Glioblastoma	G4	59	male	NA	WT	Unmethylated	NA	Unspecified
TCGA-28-2509	M-Lb	Mesenchymal	Glioblastoma	G4	77	female	80	WT	Methylated	Mesenchymal	Chemoradiation
TCGA-28-2513	M-Lb	Mesenchymal	Glioblastoma	G4	69	female	80	WT	Unmethylated	Mesenchymal	Chemoradiation
TCGA-28-2514	M-Lb	Classical	Glioblastoma	G4	45	male	60	WT	Unmethylated	Classical	Radiation
TCGA-28-5204	M-Lb	Neural	Glioblastoma	G4	72	male	80	WT	Unmethylated	Neural	Chemoradiation
TCGA-28-5208	M-Lb	Mesenchymal	Glioblastoma	G4	52	male	70	WT	Methylated	Mesenchymal	Chemoradiation
TCGA-28-5209	M-Lb	Mesenchymal	Glioblastoma	G4	66	female	NA	WT	Methylated	Mesenchymal	Chemoradiation
TCGA-28-5213	M-Lb	Mesenchymal	Glioblastoma	G4	72	male	80	WT	Unmethylated	Mesenchymal	Chemoradiation
TCGA-32-1982	M-Lb	Neural	Glioblastoma	G4	76	female	80	WT	Methylated	Neural	Chemotherapy
TCGA-32-2632	M-Lb	Mesenchymal	Glioblastoma	G4	80	male	NA	WT	Unmethylated	Mesenchymal	Radiation
TCGA-32-5222	M-Lb	Proneural	Glioblastoma	G4	66	male	NA	WT	Methylated	Proneural	Chemoradiation
TCGA-41-2572	M-Lb	Classical	Glioblastoma	G4	67	male	NA	WT	Unmethylated	Classical	Chemoradiation
TCGA-76-4932	M-Lb	Proneural	Glioblastoma	G4	50	female	80	WT	Methylated	Proneural	Radiation

## Sheet: MesenchymalVsMatrisomeSubtypes
Patient ID	Matrix group annotations	Sample ID	Gene expression Subtype
TCGA-02-0055-01	MH	TCGA.02.0055.01	Mesenchymal
TCGA-06-0130-01	MH	TCGA.06.0130.01	Mesenchymal
TCGA-06-0141-01	MH	TCGA.06.0141.01	Mesenchymal
TCGA-06-0152-02	MH	TCGA.06.0152.02	Mesenchymal
TCGA-06-0168-01	MH	TCGA.06.0168.01	Mesenchymal
TCGA-06-0190-01	MH	TCGA.06.0190.01	Mesenchymal
TCGA-06-0190-02	MH	TCGA.06.0190.02	Mesenchymal
TCGA-06-0210-01	MH	TCGA.06.0210.01	Mesenchymal
TCGA-06-0210-02	MH	TCGA.06.0210.02	Mesenchymal
TCGA-06-0644-01	MH	TCGA.06.0644.01	Mesenchymal
TCGA-06-0645-01	MH	TCGA.06.0645.01	Mesenchymal
TCGA-06-0750-01	MH	TCGA.06.0750.01	Mesenchymal
TCGA-06-2562-01	MH	TCGA.06.2562.01	Mesenchymal
TCGA-06-2569-01	MH	TCGA.06.2569.01	Mesenchymal
TCGA-06-5410-01	MH	TCGA.06.5410.01	Mesenchymal
TCGA-06-5412-01	MH	TCGA.06.5412.01	Mesenchymal
TCGA-12-0619-01	MH	TCGA.12.0619.01	Mesenchymal
TCGA-14-0781-01	MH	TCGA.14.0781.01	Mesenchymal
TCGA-14-0789-01	MH	TCGA.14.0789.01	Mesenchymal
TCGA-19-1389-02	MH	TCGA.19.1389.02	Mesenchymal
TCGA-27-1832-01	MH	TCGA.27.1832.01	Mesenchymal
TCGA-27-2524-01	MH	TCGA.27.2524.01	Mesenchymal
TCGA-28-1753-01	MH	TCGA.28.1753.01	Mesenchymal
TCGA-28-5215-01	MH	TCGA.28.5215.01	Mesenchymal
TCGA-28-5216-01	MH	TCGA.28.5216.01	Mesenchymal
TCGA-28-5218-01	MH	TCGA.28.5218.01	Mesenchymal
TCGA-32-2615-01	MH	TCGA.32.2615.01	Mesenchymal
TCGA-32-4213-01	MH	TCGA.32.4213.01	Mesenchymal
TCGA-41-3915-01	MH	TCGA.41.3915.01	Mesenchymal
TCGA-41-4097-01	MH	TCGA.41.4097.01	Mesenchymal
TCGA-06-1804-01	Mla	TCGA.06.1804.01	Mesenchymal
TCGA-06-2561-01	Mla	TCGA.06.2561.01	Mesenchymal
TCGA-06-5858-01	Mla	TCGA.06.5858.01	Mesenchymal
TCGA-19-1787-01	Mla	TCGA.19.1787.01	Mesenchymal
TCGA-26-5136-01	Mla	TCGA.26.5136.01	Mesenchymal
TCGA-27-2519-01	Mla	TCGA.27.2519.01	Mesenchymal
TCGA-28-5207-01	Mla	TCGA.28.5207.01	Mesenchymal
TCGA-32-2616-01	Mla	TCGA.32.2616.01	Mesenchymal
TCGA-02-2486-01	Mlb	TCGA.02.2486.01	Mesenchymal
TCGA-06-0184-01	Mlb	TCGA.06.0184.01	Mesenchymal
TCGA-06-0878-01	Mlb	TCGA.06.0878.01	Mesenchymal
TCGA-06-2557-01	Mlb	TCGA.06.2557.01	Mesenchymal
TCGA-06-5418-01	Mlb	TCGA.06.5418.01	Mesenchymal
TCGA-14-0736-02	Mlb	TCGA.14.0736.02	Mesenchymal
TCGA-14-1034-01	Mlb	TCGA.14.1034.01	Mesenchymal
TCGA-14-1034-02	Mlb	TCGA.14.1034.02	Mesenchymal
TCGA-14-1823-01	Mlb	TCGA.14.1823.01	Mesenchymal
TCGA-16-1045-01	Mlb	TCGA.16.1045.01	Mesenchymal
TCGA-26-5139-01	Mlb	TCGA.26.5139.01	Mesenchymal
TCGA-28-2509-01	Mlb	TCGA.28.2509.01	Mesenchymal
TCGA-28-2513-01	Mlb	TCGA.28.2513.01	Mesenchymal
TCGA-28-5208-01	Mlb	TCGA.28.5208.01	Mesenchymal
TCGA-28-5209-01	Mlb	TCGA.28.5209.01	Mesenchymal
TCGA-28-5213-01	Mlb	TCGA.28.5213.01	Mesenchymal
TCGA-32-2632-01	Mlb	TCGA.32.2632.01	Mesenchymal

## Sheet: OverallSurvival-Figure1C
Overall
(A) M-La(IDHwt)
Case ID	Study ID	Number at Risk	Status	Survival Rate	Time (months)
TCGA-41-2571	gbm_tcga	57	deceased	0.982456	0.85
TCGA-32-1980	gbm_tcga	56	deceased	0.964912	1.18
TCGA-28-1747	gbm_tcga	55	deceased	0.947368	2.53
TCGA-06-0747	gbm_tcga	54	deceased	0.929825	2.69
TCGA-06-0749	gbm_tcga	53	deceased	0.912281	2.69
TCGA-06-0174	gbm_tcga	52	deceased	0.894737	3.22
TCGA-76-4929	gbm_tcga	51	deceased	0.877193	3.65
TCGA-16-0846	gbm_tcga	50	deceased	0.859649	3.91
TCGA-19-2625	gbm_tcga	49	deceased	0.842105	4.07
TCGA-06-2567	gbm_tcga	48	deceased	0.824561	4.37
TCGA-76-4926	gbm_tcga	47	deceased	0.807018	4.53
TCGA-06-5859	gbm_tcga	46	censored	0.807018	4.57
TCGA-76-4925	gbm_tcga	45	deceased	0.789084	4.8
TCGA-19-2620	gbm_tcga	44	deceased	0.77115	4.86
TCGA-26-5134	gbm_tcga	43	censored	0.77115	5.49
TCGA-06-0646	gbm_tcga	42	deceased	0.752789	5.75
TCGA-06-0156	gbm_tcga	41	deceased	0.734429	5.85
TCGA-06-5858	gbm_tcga	40	censored	0.734429	6.14
TCGA-06-5416	gbm_tcga	39	censored	0.734429	6.7
TCGA-32-2616	gbm_tcga	38	deceased	0.715102	7.36
TCGA-14-1825	gbm_tcga	37	deceased	0.695775	7.62
TCGA-06-0745	gbm_tcga	36	deceased	0.676447	7.85
TCGA-06-5411	gbm_tcga	35	deceased	0.65712	8.34
TCGA-06-5415	gbm_tcga	34	censored	0.65712	8.54
TCGA-76-4931	gbm_tcga	33	deceased	0.637208	9.17
TCGA-26-5132	gbm_tcga	32	censored	0.637208	9.4
TCGA-12-0821	gbm_tcga	31	deceased	0.616653	10.61
TCGA-06-0158	gbm_tcga	30	deceased	0.596097	10.81
TCGA-28-5207	gbm_tcga	29	deceased	0.575542	11.27
TCGA-06-2558	gbm_tcga	28	deceased	0.554987	12.48
TCGA-19-1787	gbm_tcga	27	deceased	0.534432	12.65
TCGA-28-5220	gbm_tcga	26	deceased	0.513877	12.75
TCGA-12-0618	gbm_tcga	25	deceased	0.493322	12.98
TCGA-06-0238	gbm_tcga	24	deceased	0.472767	13.3
TCGA-06-1804	gbm_tcga	23	deceased	0.452212	13.6
TCGA-14-0790	gbm_tcga	22	deceased	0.431657	13.76
TCGA-27-1837	gbm_tcga	21	deceased	0.411102	14.03
TCGA-06-0686	gbm_tcga	20	deceased	0.390547	14.19
TCGA-12-0616	gbm_tcga	19	deceased	0.369992	14.72
TCGA-26-5133	gbm_tcga	18	censored	0.369992	14.85
TCGA-19-5960	gbm_tcga	17	deceased	0.348227	14.95
TCGA-41-5651	gbm_tcga	16	deceased	0.326463	15.11
TCGA-32-1970	gbm_tcga	15	deceased	0.304699	15.37
TCGA-06-2561	gbm_tcga	14	deceased	0.282935	17.64
TCGA-08-0386	gbm_tcga	13	deceased	0.26117	18
TCGA-27-2519	gbm_tcga	12	deceased	0.239406	18.07
TCGA-26-5136	gbm_tcga	11	deceased	0.217642	18.96
TCGA-06-0882	gbm_tcga	10	deceased	0.195878	20.76
TCGA-19-0957	gbm_tcga	9	deceased	0.174114	21.88
TCGA-12-1597	gbm_tcga	8	deceased	0.152349	22.17
TCGA-32-2634	gbm_tcga	7	censored	0.152349	22.77
TCGA-06-0138	gbm_tcga	6	deceased	0.126958	24.21
TCGA-06-0132	gbm_tcga	5	deceased	0.101566	25.33
TCGA-19-1390	gbm_tcga	4	deceased	0.0761747	25.36
TCGA-06-0743	gbm_tcga	3	deceased	0.0507832	26.38
TCGA-27-1834	gbm_tcga	2	deceased	0.0253916	40.51
TCGA-06-0178	gbm_tcga	1	deceased	0	88.07
(B) M-Lb(IDHwt)
Case ID	Study ID	Number at Risk	Status	Survival Rate	Time (months)
TCGA-19-2624	gbm_tcga	51	deceased	0.980392	0.16
TCGA-06-0219	gbm_tcga	50	deceased	0.960784	0.72
TCGA-06-2557	gbm_tcga	49	deceased	0.941176	1.08
TCGA-26-5139	gbm_tcga	48	censored	0.941176	1.58
TCGA-14-0787	gbm_tcga	47	deceased	0.921151	2.23
TCGA-06-5418	gbm_tcga	46	deceased	0.901126	2.73
TCGA-27-2526	gbm_tcga	45	deceased	0.881101	2.86
TCGA-06-0157	gbm_tcga	44	deceased	0.861076	3.19
TCGA-12-5299	gbm_tcga	43	deceased	0.841051	3.22
TCGA-06-5856	gbm_tcga	42	deceased	0.821026	3.75
TCGA-32-1982	gbm_tcga	41	deceased	0.801001	4.66
TCGA-28-2509	gbm_tcga	40	censored	0.801001	4.76
TCGA-06-2559	gbm_tcga	39	deceased	0.780463	4.93
TCGA-28-2514	gbm_tcga	38	censored	0.780463	5.26
TCGA-14-0817	gbm_tcga	37	deceased	0.759369	5.39
TCGA-06-2564	gbm_tcga	36	censored	0.759369	5.95
TCGA-14-1829	gbm_tcga	35	censored	0.759369	7.16
TCGA-06-0878	gbm_tcga	34	censored	0.759369	7.16
TCGA-28-2513	gbm_tcga	33	censored	0.759369	7.29
TCGA-32-2632	gbm_tcga	32	deceased	0.735639	8.84
TCGA-06-5414	gbm_tcga	31	censored	0.735639	8.97
TCGA-19-2619	gbm_tcga	30	censored	0.735639	9.66
TCGA-12-3650	gbm_tcga	29	deceased	0.710272	10.94
TCGA-06-5408	gbm_tcga	28	deceased	0.684905	11.73
TCGA-41-2572	gbm_tcga	27	deceased	0.659538	13.34
TCGA-15-0742	gbm_tcga	26	deceased	0.634171	13.76
TCGA-12-3653	gbm_tcga	25	deceased	0.608805	14.52
TCGA-28-5209	gbm_tcga	24	censored	0.608805	14.52
TCGA-12-5295	gbm_tcga	23	deceased	0.582335	14.91
TCGA-28-5204	gbm_tcga	22	deceased	0.555865	14.91
TCGA-14-0736	gbm_tcga	21	deceased	0.529395	15.11
TCGA-02-2485	gbm_tcga	20	censored	0.529395	15.44
TCGA-14-1034	gbm_tcga	19	deceased	0.501532	15.93
TCGA-27-2523	gbm_tcga	18	deceased	0.473669	16.06
TCGA-27-1831	gbm_tcga	17	deceased	0.445807	16.59
TCGA-06-2565	gbm_tcga	16	deceased	0.417944	16.62
TCGA-14-2554	gbm_tcga	15	deceased	0.390081	17.48
TCGA-14-1823	gbm_tcga	14	deceased	0.362218	17.84
TCGA-28-5208	gbm_tcga	13	deceased	0.334355	17.87
TCGA-32-5222	gbm_tcga	12	deceased	0.306492	19.22
TCGA-02-2486	gbm_tcga	11	deceased	0.278629	20.3
TCGA-27-1835	gbm_tcga	10	deceased	0.250766	21.29
TCGA-06-0187	gbm_tcga	9	deceased	0.222903	27.2
TCGA-16-1045	gbm_tcga	8	deceased	0.19504	29.01
TCGA-06-2563	gbm_tcga	7	censored	0.19504	30.62
TCGA-28-5213	gbm_tcga	6	censored	0.19504	31.24
TCGA-14-1402	gbm_tcga	5	deceased	0.156032	32.03
TCGA-12-3652	gbm_tcga	4	deceased	0.117024	34.89
TCGA-06-0744	gbm_tcga	3	deceased	0.0780161	46.85
TCGA-76-4932	gbm_tcga	2	deceased	0.0390081	47.9
TCGA-06-0184	gbm_tcga	1	deceased	0	69.84
(C) MH(IDHwt)
Case ID	Study ID	Number at Risk	Status	Survival Rate	Time (months)
TCGA-41-4097	gbm_tcga	39	deceased	0.974359	0.2
TCGA-06-2569	gbm_tcga	38	censored	0.974359	0.43
TCGA-06-0750	gbm_tcga	37	deceased	0.948025	0.92
TCGA-14-0781	gbm_tcga	36	deceased	0.921691	0.95
TCGA-28-1753	gbm_tcga	35	censored	0.921691	1.22
TCGA-06-0649	gbm_tcga	34	deceased	0.894582	2.1
TCGA-02-0055	gbm_tcga	33	deceased	0.867474	2.5
TCGA-76-4928	gbm_tcga	32	deceased	0.840365	3.09
TCGA-06-5410	gbm_tcga	31	deceased	0.813257	3.55
TCGA-06-5412	gbm_tcga	30	deceased	0.786148	4.53
TCGA-19-1389	gbm_tcga	29	deceased	0.75904	4.63
TCGA-27-1830	gbm_tcga	28	deceased	0.731931	5.06
TCGA-28-5218	gbm_tcga	27	deceased	0.704822	5.16
TCGA-06-0645	gbm_tcga	26	deceased	0.677714	5.75
TCGA-19-4065	gbm_tcga	25	censored	0.677714	7.03
TCGA-06-0210	gbm_tcga	24	deceased	0.649476	7.39
TCGA-27-2524	gbm_tcga	23	deceased	0.621238	7.59
TCGA-06-5413	gbm_tcga	22	censored	0.621238	8.8
TCGA-26-5135	gbm_tcga	21	deceased	0.591655	8.87
TCGA-27-1832	gbm_tcga	20	deceased	0.562072	9.86
TCGA-06-0141	gbm_tcga	19	deceased	0.53249	10.28
TCGA-06-0190	gbm_tcga	18	deceased	0.502907	10.41
TCGA-28-5215	gbm_tcga	17	deceased	0.473324	11.01
TCGA-14-0789	gbm_tcga	16	deceased	0.443741	11.24
TCGA-41-3915	gbm_tcga	15	deceased	0.414159	11.83
TCGA-06-0152	gbm_tcga	14	deceased	0.384576	12.32
TCGA-06-2562	gbm_tcga	13	deceased	0.354993	12.55
TCGA-06-0644	gbm_tcga	12	deceased	0.32541	12.61
TCGA-06-0130	gbm_tcga	11	deceased	0.295828	12.94
TCGA-06-0171	gbm_tcga	10	deceased	0.266245	13.11
TCGA-28-5216	gbm_tcga	9	censored	0.266245	13.63
TCGA-02-0047	gbm_tcga	8	deceased	0.232964	14.72
TCGA-27-2528	gbm_tcga	7	deceased	0.199684	15.77
TCGA-32-2615	gbm_tcga	6	deceased	0.166403	15.93
TCGA-76-4927	gbm_tcga	5	deceased	0.133122	17.58
TCGA-06-0168	gbm_tcga	4	deceased	0.0998418	19.65
TCGA-32-4213	gbm_tcga	3	censored	0.0998418	19.84
TCGA-32-2638	gbm_tcga	2	deceased	0.0499209	25.16
TCGA-12-0619	gbm_tcga	1	deceased	0	34.89

## Sheet: ProgressionFree-Figure1C
Progression Free
(A) M-H(IDHwt)
Case ID	Study ID	Number at Risk	Status	Survival Rate	Time (months)
TCGA-02-0055	gbm_tcga_pan_can_atlas_2018	37	deceased	0.972973	0.197258
TCGA-41-4097	gbm_tcga_pan_can_atlas_2018	36	deceased	0.945946	0.197258
TCGA-06-2569	gbm_tcga_pan_can_atlas_2018	35	censored	0.945946	0.427393
TCGA-06-0750	gbm_tcga_pan_can_atlas_2018	34	deceased	0.918124	0.920538
TCGA-14-0781	gbm_tcga_pan_can_atlas_2018	33	deceased	0.890302	0.953414
TCGA-28-1753	gbm_tcga_pan_can_atlas_2018	32	censored	0.890302	1.21643
TCGA-02-0047	gbm_tcga_pan_can_atlas_2018	31	deceased	0.861583	1.87395
TCGA-06-0649	gbm_tcga_pan_can_atlas_2018	30	deceased	0.832863	2.10409
TCGA-06-0210	gbm_tcga_pan_can_atlas_2018	29	deceased	0.804144	2.20272
TCGA-19-4065	gbm_tcga_pan_can_atlas_2018	28	deceased	0.775424	2.30134
TCGA-27-2528	gbm_tcga_pan_can_atlas_2018	27	deceased	0.746705	2.3671
TCGA-06-0644	gbm_tcga_pan_can_atlas_2018	26	deceased	0.717986	2.79449
TCGA-06-5412	gbm_tcga_pan_can_atlas_2018	25	deceased	0.689266	2.89312
TCGA-06-0190	gbm_tcga_pan_can_atlas_2018	24	deceased	0.660547	2.89312
TCGA-76-4928	gbm_tcga_pan_can_atlas_2018	23	deceased	0.631827	3.09038
TCGA-14-0789	gbm_tcga_pan_can_atlas_2018	22	deceased	0.603108	3.45202
TCGA-06-5410	gbm_tcga_pan_can_atlas_2018	21	deceased	0.574388	3.55065
TCGA-06-0171	gbm_tcga_pan_can_atlas_2018	20	deceased	0.545669	3.84653
TCGA-27-1830	gbm_tcga_pan_can_atlas_2018	19	deceased	0.51695	4.07667
TCGA-32-2615	gbm_tcga_pan_can_atlas_2018	18	deceased	0.48823	4.3068
TCGA-06-0141	gbm_tcga_pan_can_atlas_2018	17	deceased	0.459511	4.76707
TCGA-06-2562	gbm_tcga_pan_can_atlas_2018	16	deceased	0.430791	4.96433
TCGA-28-5218	gbm_tcga_pan_can_atlas_2018	15	censored	0.430791	5.16159
TCGA-28-5215	gbm_tcga_pan_can_atlas_2018	14	deceased	0.400021	5.39172
TCGA-06-0645	gbm_tcga_pan_can_atlas_2018	13	deceased	0.36925	5.75336
TCGA-27-1832	gbm_tcga_pan_can_atlas_2018	12	deceased	0.338479	5.78624
TCGA-06-5413	gbm_tcga_pan_can_atlas_2018	11	deceased	0.307708	6.41089
TCGA-12-0619	gbm_tcga_pan_can_atlas_2018	10	deceased	0.276937	6.6739
TCGA-27-2524	gbm_tcga_pan_can_atlas_2018	9	deceased	0.246166	7.59444
TCGA-06-0130	gbm_tcga_pan_can_atlas_2018	8	deceased	0.215396	8.02183
TCGA-26-5135	gbm_tcga_pan_can_atlas_2018	7	censored	0.215396	8.87662
TCGA-41-3915	gbm_tcga_pan_can_atlas_2018	6	deceased	0.179496	9.46839
TCGA-32-4213	gbm_tcga_pan_can_atlas_2018	5	deceased	0.143597	11.6054
TCGA-28-5216	gbm_tcga_pan_can_atlas_2018	4	censored	0.143597	13.6437
TCGA-76-4927	gbm_tcga_pan_can_atlas_2018	3	deceased	0.0957314	13.6766
TCGA-06-0168	gbm_tcga_pan_can_atlas_2018	2	deceased	0.0478657	15.156
TCGA-32-2638	gbm_tcga_pan_can_atlas_2018	1	deceased	0	25.1833
(B) M-La(IDHwt)
Case ID	Study ID	Number at Risk	Status	Survival Rate	Time (months)
TCGA-41-2571	gbm_tcga_pan_can_atlas_2018	55	deceased	0.981818	0.854785
TCGA-76-4926	gbm_tcga_pan_can_atlas_2018	54	deceased	0.963636	1.1178
TCGA-32-1980	gbm_tcga_pan_can_atlas_2018	53	deceased	0.945455	1.18355
TCGA-06-0174	gbm_tcga_pan_can_atlas_2018	52	deceased	0.927273	1.54519
TCGA-28-1747	gbm_tcga_pan_can_atlas_2018	51	censored	0.927273	2.53148
TCGA-06-2561	gbm_tcga_pan_can_atlas_2018	50	deceased	0.908727	2.56436
TCGA-06-0747	gbm_tcga_pan_can_atlas_2018	49	deceased	0.890182	2.69586
TCGA-14-1825	gbm_tcga_pan_can_atlas_2018	48	deceased	0.871636	2.69586
TCGA-06-0749	gbm_tcga_pan_can_atlas_2018	47	deceased	0.853091	2.69586
TCGA-76-4925	gbm_tcga_pan_can_atlas_2018	46	deceased	0.834545	2.89312
TCGA-06-0646	gbm_tcga_pan_can_atlas_2018	45	deceased	0.816	2.95887
TCGA-06-0158	gbm_tcga_pan_can_atlas_2018	44	deceased	0.797455	2.95887
TCGA-06-0745	gbm_tcga_pan_can_atlas_2018	43	deceased	0.778909	3.02462
TCGA-06-5858	gbm_tcga_pan_can_atlas_2018	42	deceased	0.760364	3.18901
TCGA-76-4929	gbm_tcga_pan_can_atlas_2018	41	deceased	0.741818	3.64928
TCGA-76-4931	gbm_tcga_pan_can_atlas_2018	40	deceased	0.723273	3.68215
TCGA-16-0846	gbm_tcga_pan_can_atlas_2018	39	deceased	0.704727	3.91229
TCGA-19-2625	gbm_tcga_pan_can_atlas_2018	38	censored	0.704727	4.07667
TCGA-06-2567	gbm_tcga_pan_can_atlas_2018	37	deceased	0.685681	4.37255
TCGA-27-1837	gbm_tcga_pan_can_atlas_2018	36	deceased	0.666634	4.47118
TCGA-06-5859	gbm_tcga_pan_can_atlas_2018	35	censored	0.666634	4.56981
TCGA-19-2620	gbm_tcga_pan_can_atlas_2018	34	censored	0.666634	4.8657
TCGA-06-0686	gbm_tcga_pan_can_atlas_2018	33	deceased	0.646433	5.26022
TCGA-26-5134	gbm_tcga_pan_can_atlas_2018	32	censored	0.646433	5.49035
TCGA-06-0743	gbm_tcga_pan_can_atlas_2018	31	deceased	0.62558	5.78624
TCGA-12-1597	gbm_tcga_pan_can_atlas_2018	30	deceased	0.604728	5.91774
TCGA-32-2616	gbm_tcga_pan_can_atlas_2018	29	deceased	0.583875	5.9835
TCGA-06-0178	gbm_tcga_pan_can_atlas_2018	28	deceased	0.563022	6.31226
TCGA-06-5416	gbm_tcga_pan_can_atlas_2018	27	censored	0.563022	6.70678
TCGA-41-5651	gbm_tcga_pan_can_atlas_2018	26	deceased	0.541367	6.90403
TCGA-06-0882	gbm_tcga_pan_can_atlas_2018	25	deceased	0.519713	7.00266
TCGA-06-5411	gbm_tcga_pan_can_atlas_2018	24	deceased	0.498058	7.03554
TCGA-27-2519	gbm_tcga_pan_can_atlas_2018	23	deceased	0.476403	8.41635
TCGA-12-0821	gbm_tcga_pan_can_atlas_2018	22	deceased	0.454749	8.51498
TCGA-06-5415	gbm_tcga_pan_can_atlas_2018	21	censored	0.454749	8.54785
TCGA-28-5220	gbm_tcga_pan_can_atlas_2018	20	deceased	0.432011	8.6136
TCGA-26-5132	gbm_tcga_pan_can_atlas_2018	19	censored	0.432011	9.40264
TCGA-19-1787	gbm_tcga_pan_can_atlas_2018	18	deceased	0.408011	10.1259
TCGA-06-0238	gbm_tcga_pan_can_atlas_2018	17	deceased	0.38401	10.2245
TCGA-27-1834	gbm_tcga_pan_can_atlas_2018	16	deceased	0.360009	11.0136
TCGA-28-5207	gbm_tcga_pan_can_atlas_2018	15	deceased	0.336009	11.2766
TCGA-26-5133	gbm_tcga_pan_can_atlas_2018	14	deceased	0.312008	12.1643
TCGA-06-2558	gbm_tcga_pan_can_atlas_2018	13	censored	0.312008	12.493
TCGA-19-5960	gbm_tcga_pan_can_atlas_2018	12	deceased	0.286007	12.5588
TCGA-06-0138	gbm_tcga_pan_can_atlas_2018	11	deceased	0.260007	12.9533
TCGA-12-0618	gbm_tcga_pan_can_atlas_2018	10	censored	0.260007	12.9862
TCGA-12-0616	gbm_tcga_pan_can_atlas_2018	9	deceased	0.231117	13.0848
TCGA-32-1970	gbm_tcga_pan_can_atlas_2018	8	deceased	0.202227	13.4136
TCGA-06-1804	gbm_tcga_pan_can_atlas_2018	7	deceased	0.173338	13.6108
TCGA-14-0790	gbm_tcga_pan_can_atlas_2018	6	deceased	0.144448	13.7752
TCGA-08-0386	gbm_tcga_pan_can_atlas_2018	5	deceased	0.115559	14.0382
TCGA-06-0132	gbm_tcga_pan_can_atlas_2018	4	deceased	0.0866689	15.8464
TCGA-26-5136	gbm_tcga_pan_can_atlas_2018	3	deceased	0.0577793	18.9697
TCGA-32-2634	gbm_tcga_pan_can_atlas_2018	2	censored	0.0577793	22.7833
TCGA-19-1390	gbm_tcga_pan_can_atlas_2018	1	censored	0.0577793	25.3805
(C) M-lb(IDHwt)
Case ID	Study ID	Number at Risk	Status	Survival Rate	Time (months)
TCGA-19-2624	gbm_tcga_pan_can_atlas_2018	50	censored	1	0.164382
TCGA-06-0219	gbm_tcga_pan_can_atlas_2018	49	deceased	0.979592	0.72328
TCGA-06-2557	gbm_tcga_pan_can_atlas_2018	48	deceased	0.959184	1.08492
TCGA-26-5139	gbm_tcga_pan_can_atlas_2018	47	censored	0.959184	1.57806
TCGA-06-0878	gbm_tcga_pan_can_atlas_2018	46	deceased	0.938332	2.16984
TCGA-14-0787	gbm_tcga_pan_can_atlas_2018	45	censored	0.938332	2.23559
TCGA-28-2513	gbm_tcga_pan_can_atlas_2018	44	deceased	0.917006	2.46573
TCGA-06-5418	gbm_tcga_pan_can_atlas_2018	43	deceased	0.89568	2.72874
TCGA-27-2526	gbm_tcga_pan_can_atlas_2018	42	deceased	0.874355	2.86024
TCGA-28-2499	gbm_tcga_pan_can_atlas_2018	41	censored	0.874355	3.12325
TCGA-06-0157	gbm_tcga_pan_can_atlas_2018	40	deceased	0.852496	3.18901
TCGA-12-5299	gbm_tcga_pan_can_atlas_2018	39	deceased	0.830637	3.22188
TCGA-06-5856	gbm_tcga_pan_can_atlas_2018	38	deceased	0.808778	3.7479
TCGA-32-5222	gbm_tcga_pan_can_atlas_2018	37	deceased	0.786919	3.87941
TCGA-41-2572	gbm_tcga_pan_can_atlas_2018	36	deceased	0.76506	4.01091
TCGA-14-1823	gbm_tcga_pan_can_atlas_2018	35	deceased	0.743201	4.60269
TCGA-32-1982	gbm_tcga_pan_can_atlas_2018	34	deceased	0.721343	4.66844
TCGA-27-1831	gbm_tcga_pan_can_atlas_2018	33	deceased	0.699484	4.73419
TCGA-28-2509	gbm_tcga_pan_can_atlas_2018	32	censored	0.699484	4.76707
TCGA-19-2619	gbm_tcga_pan_can_atlas_2018	31	deceased	0.67692	4.79995
TCGA-28-5208	gbm_tcga_pan_can_atlas_2018	30	deceased	0.654356	4.8657
TCGA-06-2559	gbm_tcga_pan_can_atlas_2018	29	deceased	0.631792	4.93145
TCGA-27-1835	gbm_tcga_pan_can_atlas_2018	28	deceased	0.609228	5.16159
TCGA-06-5408	gbm_tcga_pan_can_atlas_2018	27	deceased	0.586664	5.19446
TCGA-28-2514	gbm_tcga_pan_can_atlas_2018	26	censored	0.586664	5.26022
TCGA-14-0817	gbm_tcga_pan_can_atlas_2018	25	censored	0.586664	5.39172
TCGA-06-5414	gbm_tcga_pan_can_atlas_2018	24	deceased	0.562219	5.49035
TCGA-06-2565	gbm_tcga_pan_can_atlas_2018	23	deceased	0.537775	5.85199
TCGA-06-2564	gbm_tcga_pan_can_atlas_2018	22	censored	0.537775	5.95062
TCGA-02-2485	gbm_tcga_pan_can_atlas_2018	21	deceased	0.512167	6.115
TCGA-12-3652	gbm_tcga_pan_can_atlas_2018	20	deceased	0.486558	6.6739
TCGA-14-1829	gbm_tcga_pan_can_atlas_2018	19	censored	0.486558	7.16704
TCGA-12-3653	gbm_tcga_pan_can_atlas_2018	18	deceased	0.459527	7.3643
TCGA-15-0742	gbm_tcga_pan_can_atlas_2018	17	deceased	0.432496	7.62731
TCGA-12-3650	gbm_tcga_pan_can_atlas_2018	16	deceased	0.405465	7.85745
TCGA-32-2632	gbm_tcga_pan_can_atlas_2018	15	deceased	0.378434	8.84374
TCGA-14-1034	gbm_tcga_pan_can_atlas_2018	14	deceased	0.351403	9.27113
TCGA-12-5295	gbm_tcga_pan_can_atlas_2018	13	deceased	0.324372	13.1177
TCGA-27-2523	gbm_tcga_pan_can_atlas_2018	12	deceased	0.297341	13.2163
TCGA-28-5209	gbm_tcga_pan_can_atlas_2018	11	censored	0.297341	14.5313
TCGA-28-5204	gbm_tcga_pan_can_atlas_2018	10	deceased	0.267607	14.9259
TCGA-06-0187	gbm_tcga_pan_can_atlas_2018	9	deceased	0.237873	17.4573
TCGA-14-2554	gbm_tcga_pan_can_atlas_2018	8	deceased	0.208139	17.4902
TCGA-06-2563	gbm_tcga_pan_can_atlas_2018	7	deceased	0.178405	18.2135
TCGA-02-2486	gbm_tcga_pan_can_atlas_2018	6	deceased	0.148671	20.3176
TCGA-16-1045	gbm_tcga_pan_can_atlas_2018	5	deceased	0.118937	21.5011
TCGA-28-5213	gbm_tcga_pan_can_atlas_2018	4	censored	0.118937	31.2654
TCGA-06-0184	gbm_tcga_pan_can_atlas_2018	3	deceased	0.079291	41.9502
TCGA-06-0744	gbm_tcga_pan_can_atlas_2018	2	deceased	0.0396455	41.9831
TCGA-76-4932	gbm_tcga_pan_can_atlas_2018	1	deceased	0	47.9337

## Sheet: OverallSurvival-Figure1D
Overall
(A) MH-Mes
Case ID	Study ID	Number at Risk	Status	Survival Rate	Time (months)
TCGA-41-4097	gbm_tcga_pan_can_atlas_2018	29	deceased	0.965517	0.197258
TCGA-06-2569	gbm_tcga_pan_can_atlas_2018	28	censored	0.965517	0.427393
TCGA-06-0750	gbm_tcga_pan_can_atlas_2018	27	deceased	0.929757	0.920538
TCGA-14-0781	gbm_tcga_pan_can_atlas_2018	26	deceased	0.893997	0.953414
TCGA-28-1753	gbm_tcga_pan_can_atlas_2018	25	censored	0.893997	1.21643
TCGA-02-0055	gbm_tcga_pan_can_atlas_2018	24	deceased	0.856748	2.4986
TCGA-06-5410	gbm_tcga_pan_can_atlas_2018	23	deceased	0.819498	3.55065
TCGA-06-5412	gbm_tcga_pan_can_atlas_2018	22	deceased	0.782248	4.53694
TCGA-19-1389	gbm_tcga_pan_can_atlas_2018	21	deceased	0.744998	4.63557
TCGA-28-5218	gbm_tcga_pan_can_atlas_2018	20	deceased	0.707748	5.16159
TCGA-06-0645	gbm_tcga_pan_can_atlas_2018	19	deceased	0.670498	5.75336
TCGA-06-0210	gbm_tcga_pan_can_atlas_2018	18	deceased	0.633248	7.39718
TCGA-27-2524	gbm_tcga_pan_can_atlas_2018	17	deceased	0.595998	7.59444
TCGA-27-1832	gbm_tcga_pan_can_atlas_2018	16	deceased	0.558748	9.86291
TCGA-06-0141	gbm_tcga_pan_can_atlas_2018	15	deceased	0.521499	10.2903
TCGA-06-0190	gbm_tcga_pan_can_atlas_2018	14	deceased	0.484249	10.4218
TCGA-28-5215	gbm_tcga_pan_can_atlas_2018	13	deceased	0.446999	11.0136
TCGA-14-0789	gbm_tcga_pan_can_atlas_2018	12	deceased	0.409749	11.2437
TCGA-41-3915	gbm_tcga_pan_can_atlas_2018	11	deceased	0.372499	11.8355
TCGA-06-0152	gbm_tcga_pan_can_atlas_2018	10	deceased	0.335249	12.3286
TCGA-06-2562	gbm_tcga_pan_can_atlas_2018	9	deceased	0.297999	12.5588
TCGA-06-0644	gbm_tcga_pan_can_atlas_2018	8	deceased	0.260749	12.6245
TCGA-06-0130	gbm_tcga_pan_can_atlas_2018	7	deceased	0.223499	12.9533
TCGA-28-5216	gbm_tcga_pan_can_atlas_2018	6	censored	0.223499	13.6437
TCGA-32-2615	gbm_tcga_pan_can_atlas_2018	5	deceased	0.178799	15.945
TCGA-06-0168	gbm_tcga_pan_can_atlas_2018	4	deceased	0.1341	19.6601
TCGA-32-4213	gbm_tcga_pan_can_atlas_2018	3	censored	0.1341	19.8573
TCGA-06-0650	gbm_tcga_pan_can_atlas_2018	2	deceased	0.0670498	23.5723
TCGA-12-0619	gbm_tcga_pan_can_atlas_2018	1	deceased	0	34.9147
(B) ML-Mes
Case ID	Study ID	Number at Risk	Status	Survival Rate	Time (months)
TCGA-06-2557	gbm_tcga_pan_can_atlas_2018	24	deceased	0.958333	1.08492
TCGA-26-5139	gbm_tcga_pan_can_atlas_2018	23	censored	0.958333	1.57806
TCGA-06-5418	gbm_tcga_pan_can_atlas_2018	22	deceased	0.914773	2.72874
TCGA-28-2509	gbm_tcga_pan_can_atlas_2018	21	censored	0.914773	4.76707
TCGA-06-5858	gbm_tcga_pan_can_atlas_2018	20	censored	0.914773	6.14788
TCGA-06-0878	gbm_tcga_pan_can_atlas_2018	19	censored	0.914773	7.16704
TCGA-28-2513	gbm_tcga_pan_can_atlas_2018	18	censored	0.914773	7.29855
TCGA-32-2616	gbm_tcga_pan_can_atlas_2018	17	deceased	0.860963	7.3643
TCGA-32-2632	gbm_tcga_pan_can_atlas_2018	16	deceased	0.807152	8.84374
TCGA-28-5207	gbm_tcga_pan_can_atlas_2018	15	deceased	0.753342	11.2766
TCGA-19-1787	gbm_tcga_pan_can_atlas_2018	14	deceased	0.699532	12.6574
TCGA-28-5209	gbm_tcga_pan_can_atlas_2018	13	censored	0.699532	14.5313
TCGA-14-0736	gbm_tcga_pan_can_atlas_2018	12	deceased	0.641238	15.1231
TCGA-14-1034	gbm_tcga_pan_can_atlas_2018	11	deceased	0.582943	15.945
TCGA-06-2561	gbm_tcga_pan_can_atlas_2018	10	deceased	0.524649	17.6546
TCGA-14-1823	gbm_tcga_pan_can_atlas_2018	9	deceased	0.466355	17.8519
TCGA-28-5208	gbm_tcga_pan_can_atlas_2018	8	deceased	0.40806	17.8847
TCGA-27-2519	gbm_tcga_pan_can_atlas_2018	7	deceased	0.349766	18.082
TCGA-26-5136	gbm_tcga_pan_can_atlas_2018	6	deceased	0.291472	18.9697
TCGA-02-2486	gbm_tcga_pan_can_atlas_2018	5	deceased	0.233177	20.3176
TCGA-06-1084	gbm_tcga_pan_can_atlas_2018	4	deceased	0.174883	23.934
TCGA-16-1045	gbm_tcga_pan_can_atlas_2018	3	deceased	0.116589	29.0298
TCGA-28-5213	gbm_tcga_pan_can_atlas_2018	2	censored	0.116589	31.2654
TCGA-06-0184	gbm_tcga_pan_can_atlas_2018	1	deceased	0	69.8951

## Sheet: PrgressionFree-Figure1D
Progression Free
(A) MH-Mes
Case ID	Study ID	Number at Risk	Status	Survival Rate	Time (months)
TCGA-02-0055	gbm_tcga_pan_can_atlas_2018	29	deceased	0.965517	0.197258
TCGA-41-4097	gbm_tcga_pan_can_atlas_2018	28	deceased	0.931034	0.197258
TCGA-06-2569	gbm_tcga_pan_can_atlas_2018	27	censored	0.931034	0.427393
TCGA-06-0750	gbm_tcga_pan_can_atlas_2018	26	deceased	0.895225	0.920538
TCGA-14-0781	gbm_tcga_pan_can_atlas_2018	25	deceased	0.859416	0.953414
TCGA-28-1753	gbm_tcga_pan_can_atlas_2018	24	censored	0.859416	1.21643
TCGA-06-0210	gbm_tcga_pan_can_atlas_2018	23	deceased	0.822051	2.20272
TCGA-19-1389	gbm_tcga_pan_can_atlas_2018	22	deceased	0.784685	2.66298
TCGA-06-0644	gbm_tcga_pan_can_atlas_2018	21	deceased	0.747319	2.79449
TCGA-06-5412	gbm_tcga_pan_can_atlas_2018	20	deceased	0.709953	2.89312
TCGA-06-0190	gbm_tcga_pan_can_atlas_2018	19	deceased	0.672587	2.89312
TCGA-14-0789	gbm_tcga_pan_can_atlas_2018	18	deceased	0.635221	3.45202
TCGA-06-5410	gbm_tcga_pan_can_atlas_2018	17	deceased	0.597855	3.55065
TCGA-32-2615	gbm_tcga_pan_can_atlas_2018	16	deceased	0.560489	4.3068
TCGA-06-0141	gbm_tcga_pan_can_atlas_2018	15	deceased	0.523123	4.76707
TCGA-06-2562	gbm_tcga_pan_can_atlas_2018	14	deceased	0.485757	4.96433
TCGA-28-5218	gbm_tcga_pan_can_atlas_2018	13	censored	0.485757	5.16159
TCGA-28-5215	gbm_tcga_pan_can_atlas_2018	12	deceased	0.445277	5.39172
TCGA-06-0645	gbm_tcga_pan_can_atlas_2018	11	deceased	0.404798	5.75336
TCGA-27-1832	gbm_tcga_pan_can_atlas_2018	10	deceased	0.364318	5.78624
TCGA-12-0619	gbm_tcga_pan_can_atlas_2018	9	deceased	0.323838	6.6739
TCGA-27-2524	gbm_tcga_pan_can_atlas_2018	8	deceased	0.283358	7.59444
TCGA-06-0130	gbm_tcga_pan_can_atlas_2018	7	deceased	0.242879	8.02183
TCGA-41-3915	gbm_tcga_pan_can_atlas_2018	6	deceased	0.202399	9.46839
TCGA-06-0152	gbm_tcga_pan_can_atlas_2018	5	deceased	0.161919	9.83003
TCGA-06-0650	gbm_tcga_pan_can_atlas_2018	4	deceased	0.121439	11.5396
TCGA-32-4213	gbm_tcga_pan_can_atlas_2018	3	deceased	0.0809595	11.6054
TCGA-28-5216	gbm_tcga_pan_can_atlas_2018	2	censored	0.0809595	13.6437
TCGA-06-0168	gbm_tcga_pan_can_atlas_2018	1	deceased	0	15.156
(B) ML-Mes
Case ID	Study ID	Number at Risk	Status	Survival Rate	Time (months)
TCGA-06-2557	gbm_tcga_pan_can_atlas_2018	24	deceased	0.958333	1.08492
TCGA-26-5139	gbm_tcga_pan_can_atlas_2018	23	censored	0.958333	1.57806
TCGA-06-0878	gbm_tcga_pan_can_atlas_2018	22	deceased	0.914773	2.16984
TCGA-28-2513	gbm_tcga_pan_can_atlas_2018	21	deceased	0.871212	2.46573
TCGA-06-2561	gbm_tcga_pan_can_atlas_2018	20	deceased	0.827652	2.56436
TCGA-06-5418	gbm_tcga_pan_can_atlas_2018	19	deceased	0.784091	2.72874
TCGA-06-5858	gbm_tcga_pan_can_atlas_2018	18	deceased	0.74053	3.18901
TCGA-14-0736	gbm_tcga_pan_can_atlas_2018	17	deceased	0.69697	4.20817
TCGA-14-1823	gbm_tcga_pan_can_atlas_2018	16	deceased	0.653409	4.60269
TCGA-28-2509	gbm_tcga_pan_can_atlas_2018	15	censored	0.653409	4.76707
TCGA-28-5208	gbm_tcga_pan_can_atlas_2018	14	deceased	0.606737	4.8657
TCGA-32-2616	gbm_tcga_pan_can_atlas_2018	13	deceased	0.560065	5.9835
TCGA-06-1084	gbm_tcga_pan_can_atlas_2018	12	deceased	0.513393	6.83828
TCGA-27-2519	gbm_tcga_pan_can_atlas_2018	11	deceased	0.466721	8.41635
TCGA-32-2632	gbm_tcga_pan_can_atlas_2018	10	deceased	0.420049	8.84374
TCGA-14-1034	gbm_tcga_pan_can_atlas_2018	9	deceased	0.373377	9.27113
TCGA-19-1787	gbm_tcga_pan_can_atlas_2018	8	deceased	0.326705	10.1259
TCGA-28-5207	gbm_tcga_pan_can_atlas_2018	7	deceased	0.280032	11.2766
TCGA-28-5209	gbm_tcga_pan_can_atlas_2018	6	censored	0.280032	14.5313
TCGA-26-5136	gbm_tcga_pan_can_atlas_2018	5	deceased	0.224026	18.9697
TCGA-02-2486	gbm_tcga_pan_can_atlas_2018	4	deceased	0.168019	20.3176
TCGA-16-1045	gbm_tcga_pan_can_atlas_2018	3	deceased	0.112013	21.5011
TCGA-28-5213	gbm_tcga_pan_can_atlas_2018	2	censored	0.112013	31.2654
TCGA-06-0184	gbm_tcga_pan_can_atlas_2018	1	deceased	0	41.9502
