# Supplementary material for: A prognostic matrix gene expression signature defines functional glioblastoma phenotypes and niches
Source: Research Square preprint supplement (doi:10.21203/rs.3.rs-4541464/v1), 2024-06-21
Supplement: Supplementary file 10 [file Table S3. Multivariate analysis-Survival.xlsx]

## Sheet: Sheet1
Table S3. Multivariate analysis to predict overall survival response based on clinical parameters in CMP defined subgroups.
Variables (3)	Reference (#)	Coefficient Estimate	Standard Error	T-Stat	P-Value		Response Variable	Variables	Reference Category	Coefficient Estimate	Standard Error	T-Stat	P-Value	Population Size
CMP Sub-group							Overall Survival (Months)	M-Status_M-L (a+b)	M-H	0.39	0.0655	5.944	2.78e-09	111
M-La (57)	M-H (45)	0.221	0.075	2.96	0.00304513			Sex_male	Female	0.026	0.0511	0.514	0.607122	97
M-Lb (54)		0.504	0.069	7.309	2.7e-13			Original_Mesenchymal	Classical	0.054	0.064	0.855	0.392806	53
Gender								Original_Neural		0.002	0.069	0.032	0.97446	26
Male (97)	Female (59)	0.063	0.052	1.211	0.226063			Original_OTHER		-0.048	0.232	-0.207	0.836223	3
GBM Sub-type								Original_Proneural		-0.219	0.069	-3.2	0.00137203	29
Mesenchymal (53)	Classical (45)	0.074	0.064	1.156	0.247773			MGMT_NA	Methylated	0.191	0.065	2.942	0.0032631	32
Neural (26)		0.093	0.072	1.304	0.192131			MGMT_Unmethylated		-0.421	0.055	-7.603	2.88e-14	72
Proneural (29)		-0.094	0.073	-1.29	0.197101			Treatment_Radiation	Chemoradiation	-0.355	0.054	-6.592	4.31e-11	50
MGMT Methylation Status								Treatment_Others		-0.557	0.193	-2.887	0.0038935	5
Unmethylated (72)	Methylated (52)	-0.44	0.056	-7.878	3.33e-15			Age		-0.01	0.002	-5.397	6.78e-08	156
Treatment
Radiation Only (50)	Chemoradiation (101)	-0.37	0.054	-6.862	6.77e-12
Age (156)
Increased (continous)		-0.012	0.002	-6.045	1.49e-09
