# Supplementary material for: A prognostic matrix gene expression signature defines functional glioblastoma phenotypes and niches
Source: Research Square preprint supplement (doi:10.21203/rs.3.rs-4541464/v1), 2024-06-21
Supplement: Supplementary file 13 [file Table S4. Clinical-profiles-scRNAseq-analysis.xlsx]

## Sheet: Sheet1
Supplementary table S4: Clinical information of GBM patients used for scRNA seq analysis
Name	Diagnosis	Grade	Sex	MGMT status	IDH status	Notes	Clinical pathological Mutations
ndGBM-01	GBM	IV	M	Not available	Wild type	Enhancing tumor in the right anterior lobe	PTEN*
ndGBM-02	GBM	IV	M	Not available	Wild type	Anterior frontal lobe	P53, NF1*
ndGBM-03	GBM	IV	F	Unmethylated	Wild type	Mass in the left parieto-occipital region	TERT,PIK3CA, PTEN
ndGBM-04	GBM	IV	F	Methylated	Wild type	Large enhancing right parietal lobe lesion	EGFR-SEPT14.E24S10, EGFR TERT
ndGBM-05	GBM	IV	M	Not available	Wild type	Large right enahncing frontal lesion	Nuclear expression of p53 in a minor subset (10%)
ndGBM-06	GBM	IV	M	Unmethylated	Wild type	Large left enhancing frontal lesion	p52, TERT, CDKN2A, NF1
ndGBM-07	GBM	IV	F	Not obtained	Wild type	Right basal ganglia necrotic mass	PTEN, p53
ndGBM-08	GBM	IV	M	Not obtained	Wild type	Right temporal insular mass	PIK3R1, MDM2, CDK4
ndGBM-09	GBM	IV	M	Methylated	Wild type	Not available	FGFR, CDK4, MDM2
ndGBM-10	GBM	IV	F	Methylated	Wild type	Large left enhancing frontal lesion	FGFR3-TACC fusion
ndGBM-11	GBM	IV	F	Not available	Wild type	Left temporal lobe	Unknown
