# Supplementary material for: A prognostic matrix gene expression signature defines functional glioblastoma phenotypes and niches
Source: Research Square preprint supplement (doi:10.21203/rs.3.rs-4541464/v1), 2024-06-21
Supplement: Supplementary file 16 [file Table S5 Proteogenomic-Survival analysis-CPTAC.xlsx]

## Sheet: CPTAC-protein-RNA-consensus
caseID	Total-RNA-expressionofSignature	Z-TotalRNASignature	PERCENTILE-RNA-signature	Total-PROTEIN-Expression-signature	Survival	Censor	M-L-consensus	M-H-consensus	Protein-cluster-class	Notes on M-H consensus	notes on M-L consensus
C3N.01364	18.2019	1.56783	0.94139	24.0691	720	0	negative	M-H'	M-H'	Included. In protein M-H cluster and with high RNA	negative. Not in M-L. Not low protein or RNA		High quality (passed pathology reiew) and IDH-wt samples
C3L.01045	10.1394	0.859348	0.804638	22.3316	66	1	negative	M-H'	M-H'	Included. In protein M-H cluster and with high RNA	negative. Not in M-L. Not low protein or RNA		Based on proteomics and clinical data from Wang et al, 2021, Cancer Cell
C3L.01043	18.6552	1.60766	0.945904	19.5528	79	1	negative	M-H'	M-H'	Included. In protein M-H cluster and with high RNA	negative. Not in M-L. Not low protein or RNA
C3L.01049	34.5199	3.00175	0.99865	17.8767	191	1	negative	M-H'	M-H'	Included. In protein M-H cluster and with high RNA	negative. Not in M-L. Not low protein or RNA
C3N.01369	25.8521	2.24008	0.987408	16.7136	NA	0	negative	M-H'	M-H'	Included. In protein M-H cluster and with high RNA	negative. Not in M-L. Not low protein or RNA
C3L.01146	19.5146	1.68318	0.953703	15.6867	509	1	negative	M-H'	M-H'	Included. In protein M-H cluster and with high RNA	negative. Not in M-L. Not low protein or RNA
C3N.02769	7.73699	0.648241	0.741271	14.5577	996	0	negative	M-H'	M-H'	Included. In protein M-H cluster and with high RNA	negative. Not in M-L. Not low protein or RNA
C3L.03407	11.188	0.951498	0.829052	13.6332	238	1	negative	M-H'	M-H'	Included. In protein M-H cluster and with high RNA	negative. Not in M-L. Not low protein or RNA
C3N.01856	19.6787	1.6976	0.955084	12.7615	382	1	negative	M-H'	M-H'	Included. In protein M-H cluster and with high RNA	negative. Not in M-L. Not low protein or RNA
C3N.01192	9.16921	0.774096	0.780263	12.6929	666	0	negative	M-H'	M-H'	Included. In protein M-H cluster and with high RNA	negative. Not in M-L. Not low protein or RNA
C3L.03400	16.3479	1.40492	0.919795	11.5319	786	0	negative	M-H'	M-H'	Included. In protein M-H cluster and with high RNA	negative. Not in M-L. Not low protein or RNA
C3N.01505	6.817	0.567399	0.714457	11.0624	192	1	negative	M-H'	M-H'	Included. In protein M-H cluster and with high RNA	negative. Not in M-L. Not low protein or RNA
C3N.00661	0.949677	0.051817	0.520354	10.742	1107	0	negative	negative	M-H'	negative due to low RNA score	negative. Not in M-L. Not low protein or RNA
C3N.03180	10.8652	0.923125	0.821752	10.387	511	1	negative	M-H'	M-H'	Included. In protein M-H cluster and with high RNA	negative. Not in M-L. Not low protein or RNA
C3N.03186	4.5943	0.372082	0.644756	9.77642	646	1	negative	negative	M-H'	negative due to low RNA score	negative. Not in M-L. Not low protein or RNA
C3L.00674	7.10281	0.592514	0.722928	8.76088	478	1	negative	M-H'	M-H'	Included. In protein M-H cluster and with high RNA	negative. Not in M-L. Not low protein or RNA
C3N.01515	8.65349	0.728777	0.766626	8.31919	19	1	negative	M-H'	M-H'	Included. In protein M-H cluster and with high RNA	negative. Not in M-L. Not low protein or RNA
C3N.01815	5.1664	0.422355	0.66329	7.92918	121	1	negative	M-H'	M-H'	Included. In protein M-H cluster and with high RNA	negative. Not in M-L. Not low protein or RNA
C3N.01367	1.40456	0.0917892	0.536254	7.32844	NA	0	negative	negative	M-H'	negative due to low RNA score	negative. Not in M-L. Not low protein or RNA
C3N.03183	4.00077	0.319927	0.625161	6.82406	315	1	negative	negative	M-H'	negative due to low RNA score	negative. Not in M-L. Not low protein or RNA
C3L.01046	17.3472	1.49273	0.932082	11.3633	349	1	negative	M-H'	M-I'	included due to high RNA and protein	negative. Not in M-L. Not low protein or RNA
C3N.02181	7.93398	0.665552	0.746839	8.46595	388	0	negative	negative	M-I'	negative. Not in M-H cluster. Low RNA or protein	negative. Not in M-L. Not low protein or RNA
C3L.01142	16.5404	1.42183	0.922283	7.03604	0	0	negative	M-H'	M-I'	included due to high RNA and protein	negative. Not in M-L. Not low protein or RNA
C3L.03266	3.81227	0.303363	0.618867	6.93602	281	1	negative	negative	M-I'	negative. Not in M-H cluster. Low RNA or protein	negative. Not in M-L. Not low protein or RNA
C3N.01518	6.11634	0.50583	0.693187	5.50772	805	1	negative	negative	M-I'	negative. Not in M-H cluster. Low RNA or protein	negative. Not in M-L. Not low protein or RNA
C3L.00104	-6.88116	-0.636306	0.26211	5.3736	129	1	negative	negative	M-I'	negative. Not in M-H cluster. Low RNA or protein	negative. Not in M-L. Not low protein or RNA
C3L.03968	0.0941244	-0.0233634	0.490381	5.33583	775	0	negative	negative	M-I'	negative. Not in M-H cluster. Low RNA or protein	negative. Not in M-L. Not low protein or RNA
C3L.01040	2.27164	0.167982	0.566381	4.48615	608	0	negative	negative	M-I'	negative. Not in M-H cluster. Low RNA or protein	negative. Not in M-L. Not low protein or RNA
C3N.01816	11.8497	1.00964	0.843404	4.41601	841	1	negative	negative	M-I'	negative. Not in M-H cluster. Low RNA or protein	negative. Not in M-L. Not low protein or RNA
C3L.02955	11.5374	0.982197	0.836732	4.31146	378	1	negative	negative	M-I'	negative. Not in M-H cluster. Low RNA or protein	negative. Not in M-L. Not low protein or RNA
C3N.02190	9.75126	0.825242	0.795091	4.03677	311	1	negative	negative	M-I'	negative. Not in M-H cluster. Low RNA or protein	negative. Not in M-L. Not low protein or RNA
C3N.02188	8.99701	0.758964	0.775761	3.98052	411	1	negative	negative	M-I'	negative. Not in M-H cluster. Low RNA or protein	negative. Not in M-L. Not low protein or RNA
C3L.03744	9.74352	0.824563	0.794897	2.35148	804	0	negative	negative	M-I'	negative. Not in M-H cluster. Low RNA or protein	negative. Not in M-L. Not low protein or RNA
C3N.01818	4.04286	0.323626	0.626562	1.9606	270	1	negative	negative	M-I'	negative. Not in M-H cluster. Low RNA or protein	negative. Not in M-L. Not low protein or RNA
C3N.02783	2.21902	0.163359	0.564562	1.45918	977	0	negative	negative	M-I'	negative. Not in M-H cluster. Low RNA or protein	negative. Not in M-L. Not low protein or RNA
C3L.03392	10.5273	0.893432	0.813905	1.14096	147	1	negative	negative	M-I'	negative. Not in M-H cluster. Low RNA or protein	negative. Not in M-L. Not low protein or RNA
C3L.03748	8.18036	0.687202	0.753712	1.03026	401	1	negative	negative	M-I'	negative. Not in M-H cluster. Low RNA or protein	negative. Not in M-L. Not low protein or RNA
C3L.02542	-4.85693	-0.45843	0.323104	0.898684	180	1	negative	negative	M-I'	negative. Not in M-H cluster. Low RNA or protein	negative. Not in M-L. Not low protein or RNA
C3N.02185	-3.22338	-0.314884	0.376176	0.209884	386	0	negative	negative	M-I'	negative. Not in M-H cluster. Low RNA or protein	negative. Not in M-L. Not low protein or RNA
C3N.01517	0.232412	-0.0112116	0.495226	0.0710425	1023	0	negative	negative	M-I'	negative. Not in M-H cluster. Low RNA or protein	negative. Not in M-L. Not low protein or RNA
C3N.03182	-1.30262	-0.1461	0.441641	-0.237689	763	1	negative	negative	M-I'	negative. Not in M-H cluster. Low RNA or protein	negative. Not in M-L. Not low protein or RNA
C3L.03405	-8.45613	-0.774703	0.219109	-0.589334	87	1	negative	negative	M-I'	negative. Not in M-H cluster. Low RNA or protein	negative. Not in M-L. Not low protein or RNA
C3N.01196	-5.94512	-0.554053	0.289574	-0.779457	684	1	negative	negative	M-I'	negative. Not in M-H cluster. Low RNA or protein	negative. Not in M-L. Not low protein or RNA
C3N.00662	0.37389	0.0012206	0.500184	-0.992644	116	1	negative	negative	M-I'	negative. Not in M-H cluster. Low RNA or protein	negative. Not in M-L. Not low protein or RNA
C3L.02504	-3.15395	-0.308783	0.378494	-1.80914	823	0	negative	negative	M-I'	negative. Not in M-H cluster. Low RNA or protein	negative. Not in M-L. Not low protein or RNA
C3N.02256	-15.9591	-1.43401	0.0757436	-2.09513	294	1	negative	negative	M-I'	negative. Not in M-H cluster. Low RNA or protein	negative. Not in M-L. Not low protein or RNA
C3L.02704	-0.479411	-0.0737619	0.470308	-2.10921	186	0	negative	negative	M-I'	negative. Not in M-H cluster. Low RNA or protein	negative. Not in M-L. Not low protein or RNA
C3N.02782	-6.77778	-0.627221	0.265077	-2.23867	985	0	negative	negative	M-I'	negative. Not in M-H cluster. Low RNA or protein	negative. Not in M-L. Not low protein or RNA
C3N.02784	0.179127	-0.0158939	0.493359	-2.56592	391	1	negative	negative	M-I'	negative. Not in M-H cluster. Low RNA or protein	negative. Not in M-L. Not low protein or RNA
C3N.01852	-1.26704	-0.142973	0.442875	-2.66402	3	0	negative	negative	M-I'	negative. Not in M-H cluster. Low RNA or protein	negative. Not in M-L. Not low protein or RNA
C3N.02785	-1.98298	-0.205886	0.41817	-2.79546	546	1	negative	negative	M-I'	negative. Not in M-H cluster. Low RNA or protein	negative. Not in M-L. Not low protein or RNA
C3N.01334	0.105451	-0.0223681	0.490778	-3.27284	7	1	negative	negative	M-I'	negative. Not in M-H cluster. Low RNA or protein	negative. Not in M-L. Not low protein or RNA
C3N.01851	-2.43042	-0.245204	0.402887	-4.06715	363	1	negative	negative	M-I'	negative. Not in M-H cluster. Low RNA or protein	negative. Not in M-L. Not low protein or RNA
C3L.02465	3.57238	0.282283	0.610811	-4.3109	591	1	negative	negative	M-I'	negative. Not in M-H cluster. Low RNA or protein	negative. Not in M-L. Not low protein or RNA
C3N.02786	3.55627	0.280867	0.610268	-4.46786	768	0	negative	negative	M-I'	negative. Not in M-H cluster. Low RNA or protein	negative. Not in M-L. Not low protein or RNA
C3L.03727	-1.326	-0.148155	0.440831	-4.97965	721	1	negative	negative	M-I'	negative. Not in M-H cluster. Low RNA or protein	negative. Not in M-L. Not low protein or RNA
C3N.03088	8.11219	0.681212	0.75182	-5.0608	142	1	negative	negative	M-I'	negative. Not in M-H cluster. Low RNA or protein	negative. Not in M-L. Not low protein or RNA
C3N.02770	-3.76482	-0.362463	0.358265	-5.2113	779	1	negative	negative	M-I'	negative. Not in M-H cluster. Low RNA or protein	negative. Not in M-L. Not low protein or RNA
C3N.01814	-11.4956	-1.04179	0.148658	-5.50585	383	0	negative	negative	M-I'	negative. Not in M-H cluster. Low RNA or protein	negative. Not in M-L. Not low protein or RNA
C3L.01155	0.200228	-0.0140397	0.494099	-5.54473	362	0	negative	negative	M-I'	negative. Not in M-H cluster. Low RNA or protein	negative. Not in M-L. Not low protein or RNA
C3L.01327	-7.18321	-0.662848	0.253541	-5.92393	646	1	negative	negative	M-I'	negative. Not in M-H cluster. Low RNA or protein	negative. Not in M-L. Not low protein or RNA
C3L.01156	-9.14652	-0.835371	0.201619	-7.13061	291	1	negative	negative	M-I'	negative. Not in M-H cluster. Low RNA or protein	negative. Not in M-L. Not low protein or RNA
C3L.01149	-19.8636	-1.77712	0.03776	-7.1971	666	0	M-L'	negative	M-I'	negative. Not in M-H cluster. Low RNA or protein	Included due to low RNA and protein
C3L.03681	-4.08076	-0.390225	0.347952	-8.21455	7	1	negative	negative	M-I'	negative. Not in M-H cluster. Low RNA or protein	negative. Not in M-L. Not low protein or RNA
C3L.01834	-16.997	-1.52522	0.0635706	-9.39939	497	1	M-L'	negative	M-I'	negative. Not in M-H cluster. Low RNA or protein	Included due to low RNA and protein
C3N.03473	-4.44558	-0.422283	0.336184	-11.3903	297	1	negative	negative	M-I'	negative. Not in M-H cluster. Low RNA or protein	negative. Not in M-L. Not low protein or RNA
C3L.00677	-11.6912	-1.05898	0.144711	-11.6914	155	1	negative	negative	M-I'	negative. Not in M-H cluster. Low RNA or protein	negative. Not in M-L. Not low protein or RNA
C3L.04084	-8.17255	-0.749785	0.226538	-5.13859	274	1	M-L'	negative	M-L'	negative. Not in M-H cluster. Low RNA or protein	Included due to M-L cluster and low RNA
C3L.03728	1.70876	0.11852	0.546856	-6.16627	127	1	negative	negative	M-L'	negative. Not in M-H cluster. Low RNA or protein	Included due to M-L cluster and low RNA
C3N.02183	10.6542	0.904585	0.816877	-6.92142	340	1	negative	negative	M-L'	negative. Not in M-H cluster. Low RNA or protein	Included due to M-L cluster and low RNA
C3L.01154	-2.98707	-0.294119	0.384081	-7.89311	496	1	M-L'	negative	M-L'	negative. Not in M-H cluster. Low RNA or protein	Included due to M-L cluster and low RNA
C3L.01048	-9.2268	-0.842425	0.199641	-9.07024	806	0	M-L'	negative	M-L'	negative. Not in M-H cluster. Low RNA or protein	Included due to M-L cluster and low RNA
C3L.02970	-21.4196	-1.91385	0.0278115	-9.24117	381	1	M-L'	negative	M-L'	negative. Not in M-H cluster. Low RNA or protein	Included due to M-L cluster and low RNA
C3L.03390	-13.5676	-1.22386	0.110435	-9.65454	815	0	M-L'	negative	M-L'	negative. Not in M-H cluster. Low RNA or protein	Included due to M-L cluster and low RNA
C3N.02186	-6.31866	-0.586877	0.278454	-9.73535	264	0	M-L'	negative	M-L'	negative. Not in M-H cluster. Low RNA or protein	Included due to M-L cluster and low RNA
C3L.01157	-3.99356	-0.382562	0.350788	-10.8806	734	0	M-L'	negative	M-L'	negative. Not in M-H cluster. Low RNA or protein	Included due to M-L cluster and low RNA
C3N.01798	-6.67276	-0.617993	0.268107	-11.6832	590	1	M-L'	negative	M-L'	negative. Not in M-H cluster. Low RNA or protein	Included due to M-L cluster and low RNA
C3L.01061	-11.722	-1.06168	0.144097	-11.8346	840	0	M-L'	negative	M-L'	negative. Not in M-H cluster. Low RNA or protein	Included due to M-L cluster and low RNA
C3N.03184	-16.017	-1.43911	0.0750201	-11.9167	390	0	M-L'	negative	M-L'	negative. Not in M-H cluster. Low RNA or protein	Included due to M-L cluster and low RNA
C3N.03188	-13.0162	-1.17541	0.119841	-12.7641	759	0	M-L'	negative	M-L'	negative. Not in M-H cluster. Low RNA or protein	Included due to M-L cluster and low RNA
C3L.02707	-11.6108	-1.05191	0.146326	-13.6301	91	0	M-L'	negative	M-L'	negative. Not in M-H cluster. Low RNA or protein	Included due to M-L cluster and low RNA
C3N.01368	-8.88898	-0.81274	0.208043	-13.7024	245	1	M-L'	negative	M-L'	negative. Not in M-H cluster. Low RNA or protein	Included due to M-L cluster and low RNA
C3L.01887	-14.5012	-1.30591	0.0957368	-15.2018	1075	0	M-L'	negative	M-L'	negative. Not in M-H cluster. Low RNA or protein	Included due to M-L cluster and low RNA
C3N.02255	-21.709	-1.93928	0.0262266	-17.1763	265	1	M-L'	negative	M-L'	negative. Not in M-H cluster. Low RNA or protein	Included due to M-L cluster and low RNA
C3L.03387	-21.2999	-1.90333	0.02849	-18.7485	403	1	M-L'	negative	M-L'	negative. Not in M-H cluster. Low RNA or protein	Included due to M-L cluster and low RNA
C3N.01857	-24.6812	-2.20046	0.013886	-19.3046	651	1	M-L'	negative	M-L'	negative. Not in M-H cluster. Low RNA or protein	Included due to M-L cluster and low RNA
