# Supplementary material for: A prognostic matrix gene expression signature defines functional glioblastoma phenotypes and niches
Source: Research Square preprint supplement (doi:10.21203/rs.3.rs-4541464/v1), 2024-06-21
Supplement: Supplementary file 19 [file Table S6. Matrix annotations of anti-PD1 treated patients.xlsx]

## Sheet: Matrisome-status
patient	subtype	PFS	OS
Pt23_A	M_H
Pt11_B	M_H
Pt21_B	M_H
Pt33_A	M_H			Patient numbering is based on Cloughesy, T.F., Mochizuki, A.Y., Orpilla, J.R. et al. Neoadjuvant anti-PD-1 immunotherapy promotes a survival benefit with intratumoral and systemic immune responses in recurrent glioblastoma. Nat Med 25, 477–486 (2019). https://doi.org/10.1038/s41591-018-0337-7
Pt31_B	M_H
Pt3_A	M_H			A’ denotes a patient in the neoadjuvant group, and ‘B’ denotes a patient in the adjuvant-only group.
Pt30_B	M_H
Pt25_A	M_H
Pt28_A	M_H
Pt20_B	M_H
Pt10_B	M_H
Pt24_B	M_H
Pt4_A	M_H
Pt16_A	M_H
Pt19_A	M_H
Pt6_A	M_H
Pt15_B	M_H
Pt35_B	M_H
Pt34_B	M_H
Pt27_A	M-L
Pt29_B	M-L
Pt26_A	M-L
Pt14_B	M-L
Pt17_B	M-L
Pt2_B	M-L
Pt22_B	M-L
Pt8_A	M-L
Pt5_A	M-L
Pt12_A	M-L

## Sheet: Survival-data
Subject ID	Treatment Group	Progression Free Survival (Days)	PFS Censored Status (0 = PF)	Overall Survival (Days)	OS Censored Status (0 = Alive, 1 = Dead)
DF-03-V-P	A	229	1	400	1
DF-04-LAK	A	57	1	249	1		Source: Cloughesy, T.F., Mochizuki, A.Y., Orpilla, J.R. et al. Neoadjuvant anti-PD-1 immunotherapy promotes a survival benefit with intratumoral and systemic immune responses in recurrent glioblastoma. Nat Med 25, 477–486 (2019). https://doi.org/10.1038/s41591-018-0337-7
DF-05-D-S	A	414	1	575	0
DF-06-S-R	A	72	1	572	0
DF-07-PAD	A	71	1	88	1
SK-08-D-F	A	375	1	434	1
MA-09-N-F	A	90	1	522	0
DF-12-G-D	A	81	1	398	1
DF-16-CAS	A	74	1	400	1
DF-19-A-E	A	455	0	476	0
MA-23-K-B	A	82	1	161	1
UT-25-L-M	A	74	1	289	1
DF-26-M-D	A	155	1	401	0
TX-27-D-C	A	263	1	418	0
LA-33-C-A	A	109	1	180	1
DF-02-CAB	B	74	1	265	1
DF-10-D-L	B	77	1	117	1
DF-11-RCC	B	51	1	51	1
SK-14-J-R	B	257	1	493	0
MA-15-D-G	B	63	1	102	1
SF-17-LSM	B	84	1	192	1
SF-20-LCK	B	125	1	340	1
SK-21-L-S	B	35	1	190	1
DF-22-L-M	B	60	1	113	1
SF-24-R-G	B	65	1	139	1
SF-29-J-C	B	307	1	376	0
SK-30-D-C	B	71	1	368	1
MA-31-PPD	B	51	1	79	1
UT-34-S-J	B	74	1	267	1
MA-35-B-A	B	79	1	266	0

## Sheet: Patient-index
Patient-ID	Object-ID
DF-12-G-D	Pt12_A
DF-16-CAS	Pt16_A
DF-19-A-E	Pt19_A
MA-23-K-B	Pt23_A
UT-25-L-M	Pt25_A
DF-26-M-D	Pt26_A
TX-27-D-C	Pt27_A
LA-33-C-A	Pt33_A
DF-02-CAB	Pt2_B
DF-10-D-L	Pt10_B
DF-11-RCC	Pt11_B
SK-14-J-R	Pt14_B
MA-15-D-G	Pt15_B
SF-17-LSM	Pt17_B
SF-20-LCK	Pt20_B
SK-21-L-S	Pt21_B
DF-22-L-M	Pt22_B
SF-24-R-G	Pt24_B
SF-29-J-C	Pt29_B
SK-30-D-C	Pt30_B
MA-31-PPD	Pt31_B
UT-34-S-J	Pt34_B
MA-35-B-A	Pt35_B
